1 **Deterministic and probabilistic fate decisions co-exist in a single**  
2 **retinal lineage**

3

4

5 Elisa Nerli<sup>1,2,3#</sup>, Jenny Kretzschmar<sup>1\*</sup>, Tommaso Bianucci<sup>2,3,4\*</sup>, Mauricio Rocha-Martins<sup>1,2</sup>, Christoph  
6 Zechner<sup>2,3,4</sup>, Caren Norden<sup>1,2,#</sup>.

7

8 \* Equal contributions

9 # Corresponding authors:

10 Caren Norden (C.N.): [cnorden@igc.gulbenkian.pt](mailto:cnorden@igc.gulbenkian.pt)

11 Elisa Nerli (E.N.): [enerli@igc.gulbenkian.pt](mailto:enerli@igc.gulbenkian.pt)

12

13 <sup>1</sup> Instituto Gulbenkian de Ciência, Rua da Quinta Grande 6, 2780-156 Oeiras, Portugal

14 <sup>2</sup> Max Planck Institute of Molecular Cell Biology and Genetics, Pfotenhauerstraße 108, 01307 Dresden,  
15 Germany

16 <sup>3</sup> Max Planck Center for Systems Biology, Pfotenhauerstraße 108, 01307 Dresden, Germany

17 <sup>4</sup> Cluster of Excellence Physics of Life, TU Dresden, 01062 Dresden, Germany

18

19

20

21

22

23

24

25

26

27

28

29

30

31

32

33

34

35

36

37

38

39 **Summary**

40 Correct nervous system development depends on the timely differentiation of progenitor cells  
41 into neurons. While the output of progenitor differentiation is well investigated at the  
42 population and clonal level, the possibilities and constraints for fate decisions of specific  
43 progenitors over development are less explored. Particularly little is known about their  
44 variability and competence plasticity. To fill this gap, we here use long-term live imaging to  
45 follow the outcome of progenitor divisions in the zebrafish retina.

46 We find that neurogenic Atoh7 expressing progenitors produce different neuronal types over  
47 development with time-dependent probabilities. Interestingly, deterministic and probabilistic  
48 fate decisions co-exist in the same lineage. While interference with the deterministic fate  
49 affects lineage progression, interference with fate probabilities of the stochastic lineage branch  
50 results in a broader range of fate possibilities than seen in controls. When tissue development  
51 is challenged, Atoh7 expressing progenitors can produce any neuronal type, arguing against  
52 the concept of fixed competence windows. Stochastic modelling of fate probabilities in  
53 challenged conditions revealed a simple gene regulatory network able to recapitulate the  
54 observed competence changes during development. Based on our results, we postulate that fate  
55 plasticity could be involved in robust retinal development, a concept possibly applicable to  
56 other tissues.

57

58

59 **Keywords:**

60 Neurogenesis, retina, fate decisions, competence, plasticity, zebrafish, live-imaging,  
61 modelling.

62

63

64

## 65 **Introduction**

66 To generate organs in a developing embryo, cells progressively become more specialized as  
67 they differentiate. Cell differentiation needs to be tightly regulated to produce the correct cell  
68 types at the right developmental time. Impairment of the temporal sequence of differentiation  
69 can have detrimental consequences for organismal development, including incorrect organ size  
70 or cellular arrangements<sup>1,2</sup>. It is thus important to unveil the factors that ensure the production  
71 of the right cell type with the correct timing. This is particularly true for the formation of the  
72 central nervous system (CNS), where timely emergence of the different neurons is an important  
73 step that later ensures correct neuronal connectivity and the formation of functioning neuronal  
74 networks<sup>2-4</sup>. Unsurprisingly, changes in the timing of neuronal specification and differentiation  
75 can impair brain formation. This in turn can lead to severe cognitive deficits including mental  
76 retardation and impairments in motor coordination<sup>5</sup>. Nevertheless, particularly in vertebrates,  
77 the factors involved in different neuronal fate decisions during development are not yet fully  
78 disclosed. This is different for the *Drosophila* nervous system, where the temporal regulation  
79 of fate decisions has been more thoroughly explored for example in the CNS and the optic  
80 lobe<sup>6-9</sup>. In these areas, a defined sequence of progenitor divisions leads to the formation of the  
81 different neurons in a consecutive manner. This sequence arises during development as  
82 multipotent progenitors are competent to form different neuronal types through the sequential  
83 expression of defined transcription factors<sup>10,11,6,12-14</sup>. In the vertebrate nervous system,  
84 however, it is less understood whether and how single progenitors competence changes during  
85 development to give rise to different neuronal types at the right time and in the right  
86 proportions. So far, some progress has been made to understand neuronal birth orders in areas  
87 including the neocortex, spinal cord, olfactory bulb and the retina<sup>15-20</sup> but these studies have  
88 been mostly performed at the clonal or the population level. This eventually led to different  
89 interpretations on whether progenitors competence is pre-determined in progenitor cells,  
90 resulting in fixed competence windows during development<sup>19,21,22</sup>, or whether it is variable and  
91 influenced by stochastic processes acting on fate decision mechanisms<sup>23-26</sup>.

92 To better understand the variability and stereotypicity of fate decisions in the vertebrate CNS,  
93 a quantitative appreciation of whether and how far the fate outcome of defined progenitor  
94 divisions changes over development is needed. To date, this has been challenging due to the  
95 fact that many parts of the vertebrate brain are not easily accessible for experimental  
96 manipulation and due to the plethora of different progenitors and neuronal types inhabiting  
97 different brain areas. An attractive system to circumvent these issues is the developing retina,  
98 the part of the CNS responsible for light collection and transmission. It is located on the outside

99 of the embryo and is populated by only five major neuronal types that are clearly  
100 distinguishable by their final position, morphology, and mode of migration<sup>27,28</sup> (Figure 1 B,  
101 B'). In addition, the imaging potential of the zebrafish embryo allows to follow the exact  
102 sequence and outcome of progenitor divisions over time and the lineage relationships between  
103 cell types in a quantitative manner<sup>23,29-31</sup>. Thus, the zebrafish retina is an ideal model to  
104 elucidate the temporal dynamics of progenitor competence and consequently to assess  
105 stereotypicity and variability in lineage decisions.

106 We here explore the possibilities as well as the constraints of fate decisions that specific  
107 zebrafish retinal progenitors present over time. Interestingly, we find that Atoh7-expressing  
108 neurogenic progenitors consistently give rise to a photoreceptor precursor and a sister cell of  
109 different fate. While photoreceptor production is deterministic, the fate of the sister cell is  
110 acquired in a probabilistic manner and these probabilities change over development. If the  
111 deterministic photoreceptor fate decision is impaired, Atoh7 progenitors do not generate a  
112 different known neuronal fate, resulting in lineage and tissue impairments. In contrast,  
113 interference with the probabilistic branch of the lineage resulted in changes in the probabilities  
114 of generating different fates, and maintenance of structural tissue integrity. Stochastic  
115 modelling of these changed probabilities revealed a simple gene regulatory network (GRN)  
116 that faithfully predicted the proportions and timing of fate decisions during normal retinal  
117 neurogenesis.

118

119

## 120 **Results**

### 121 **Neurogenic Atoh7+ progenitors produce one photoreceptor precursor and a sister cell of** 122 **variable fate**

123 Progenitors expressing the proneural transcription factor *Atoh7* (*atonal bHLH transcription*  
124 *factor 7*, also called *Ath5*) give rise to most retinal neurons<sup>30,32–34</sup>. However, the temporal  
125 sequence and distribution of fate decisions resulting from these divisions has only begun to be  
126 understood<sup>30,35</sup> (Figure 1 A). To quantitatively analyse fate distributions, we used an *Atoh7*-  
127 driven reporter construct to label these progenitors (*ath5:GFP-CAAX*)<sup>36,37</sup>. We followed their  
128 division modes and fate outcomes by long term light sheet imaging<sup>38</sup> performed between the  
129 onset of neurogenesis at 28 hours post fertilization (hpf) and 60 hpf, the time when most  
130 progenitors have entered neurogenesis<sup>39–41</sup>. Sister cell fate could unambiguously be assigned  
131 due to the distinct migration modes of the different emerging neurons, their morphology during  
132 and after migration and their final position within the tissue (Figure 1 B, B', see Methods for  
133 details).

134 Analysis of 96 divisions from 13 embryos during the entire neurogenic window revealed that  
135 *Atoh7*+ progenitors divide asymmetrically and reproducibly produce one cell with columnar  
136 morphology and a sister cell of variable fate (Figure 1 C-E, Video 1).

137 Apically positioned cells with columnar morphology were previously suggested to be  
138 immature photoreceptors, so-called photoreceptor cell precursors (PRpr)<sup>34,38,30</sup>. These cells  
139 were characterized by the expression of *crx* (cone-rod homeobox)<sup>42,43</sup> and assumed to divide  
140 symmetrically to produce two PRs<sup>42,43</sup>. However, whether all PRs result from such committed  
141 precursor divisions remained unclear. We found that the majority of *Crx*+ cells at the apical  
142 side incorporated EdU at 48 hpf, indicating that most PRpr are cycling at this developmental  
143 stage (Supplementary Figure 1 G). To test whether indeed all PRpr undergo an additional  
144 division, we performed photoconversion experiments using a *Crx:H2B-Dendra* construct at 42  
145 hpf as shown in Figure 1F. 24 hours after photoconversion, 18/19 PRpr (N = 16 embryos)  
146 divided (Figure 1 F), while 1/19 did not divide. In 16 out of these 18 PRpr divisions, two PRs  
147 were produced (Figure 1 F, G), while in 2/18 cases three or four PRs were produced. However,  
148 in these cases we cannot exclude that initially two PRpr were photoconverted. These results  
149 indicate that PRs arise from immature committed precursors (PRpr) that divide once to produce  
150 two PRs (Figure 1 G).

151  
152 While this data shows that each *Atoh7*+ progenitor division gives rise to one PRpr throughout  
153 the neurogenic window, the sister cell of the PRpr acquired a different fate. It either became a

154 retinal ganglion cell (RGC)<sup>36,37</sup> (Figure 1 C, Supplementary Figures 1 A, B, Video 1) or an  
155 inhibitory Neuron (IN), i.e., a horizontal cell precursor<sup>43–45</sup> (HCpr) (Figure 1D, Supplementary  
156 Figure 1 C, D, Video 1) or an amacrine cell<sup>29,36</sup>(AC) (Figure 1 E, Supplementary Figure 1 E,  
157 F, Video 1), but never a second PRpr or a bipolar cell (BC).

158 To understand whether and how the distribution of the fates of the PRpr sister cell  
159 changed over time, we analysed neuronal fate proportions during two neurogenic windows:  
160 between 28 hpf and 42 hpf (from here on referred to as ‘early’) and between 36 and 60 hpf  
161 (from here on referred to as ‘late’).

162 In the early window, 80.8% of divisions (with confidence interval CI = [53.5%, 100%])  
163 produced an RGC, while 19.2% (CI = [0.0%, 46.5%]) produced an inhibitory neuron (ACs or  
164 HCs) (Figure 1H). As neurogenesis progressed, the proportion of RGCs decreased (42.9%, CI  
165 = [36.0%, 53.7%]) while the proportion of inhibitory neurons increased (57.1%, CI = [46.3%,  
166 64.0%]) (Figure 1H). This indicated that the sister cell fate is acquired with time-dependent  
167 probabilities.

168 While it has been suggested that retinal progenitor competence changes during development,  
169 whether this change occurs gradually or more abruptly was still debated<sup>22,23,46</sup>. To answer this  
170 question, we plotted the time of each progenitor division and its fate outcome for the PRpr  
171 sister cell (from here on referred to as ‘*event plots*’). This analysis showed that Atoh7+  
172 progenitors gradually change competence during development (Figure 1 I), switching from a  
173 prevalent production of RGCs at early stages of neurogenesis to a progressive decrease of their  
174 production and an increased generation of INs. This is consistent with the previously suggested  
175 overlapping birth order of retinal neurons<sup>22,19,47,48</sup>.

176 We conclude that within the same lineage, deterministic and probabilistic fate decisions can  
177 co-exist. Atoh7+ progenitor divisions throughout the neurogenic window always generate one  
178 PRpr and a sister cell of variable fate. The sister cell can become an RGC or an inhibitory  
179 neuron. We never observed a bipolar cell (BC) or a second PRpr. Furthermore, we find that the  
180 probabilities of producing RGCs or INs gradually changed over development.

181

## 182 **Bipolar cells arise from the Atoh7 negative sister cell of the Atoh7+ progenitor.**

183 We showed that Atoh7+ progenitor divisions can give rise to PRpr, RGC, HC and AC,  
184 but we never observed a division producing a BC (Figure 1). This is in line with the previous  
185 notion that in zebrafish BCs arise from a different lineage that does not express Atoh7<sup>32</sup>.  
186 Analysis of a double transgenic line expressing Atoh7 and Vsx1 (a BC marker<sup>32,43</sup>) confirmed  
187 that BCs do not express Atoh7 (Supplementary Figure 2 A, B). As we previously showed that

188 divisions that produce one Atoh7<sup>+</sup> progenitor are asymmetric and also produce one Atoh7-  
189 negative progenitor cell (Atoh7<sup>-</sup>, Supplementary Figure 2 C)<sup>31</sup>, we asked whether BCs arise  
190 from this Atoh7<sup>-</sup> sister progenitor lineage (Supplementary Figure 2 C). Notch inhibition using  
191 the gamma-secretase inhibitor LY411575 from 24 hpf is known to induce symmetric division  
192 that produce two Atoh7<sup>+</sup> progenitors (Supplementary Figure 2 D)<sup>31</sup> and thus in this condition  
193 less bipolar cells should emerge. Inhibiting Notch before neurogenesis onset at 24 hpf indeed  
194 resulted in a dramatic reduction of Vsx1<sup>+</sup> BCs and an increase of Atoh7<sup>+</sup> neurons in the BC  
195 layer (Supplementary Figure 2 E). To exclude that Notch inhibition affects BC fate *per se*,  
196 Notch was inhibited from 45 hpf onwards, a stage at which BC precursors already  
197 emerged<sup>29,49,43</sup>. This treatment did not affect the BC population (Supplementary Figure 2 E,  
198 bottom panel), showing that BC fate decisions were not generally impaired upon Notch  
199 inhibition. Thus, BCs indeed seem to arise from the Atoh7-negative sister cell.

200

## 201 **Perturbing the deterministic fate decision affects overall tissue development and** 202 **generates non-canonical cell fates**

203 The fact that one PRpr was always produced during the complete neurogenic window  
204 made us ask how the outcome of Atoh7<sup>+</sup> division would change upon perturbation of this  
205 branch of the lineage. To prevent the development of PRprs and consequently PRs, we  
206 evaluated target genes resulting from a transcriptomic analysis of 42 hpf retinae, a stage at  
207 which photoreceptors are still in their committed precursor state, before terminal division  
208 (Supplementary Figure 1 G). These cells already express genes known to be involved in PR  
209 development and maturation as *crx*, *prdm1a* and *otx2b*<sup>50-55</sup> (Supplementary Figure 3 A, B,  
210 reference GSE194158 in NCBI). Differential gene expression analysis revealed that only  
211 *Prdm1a* and *Crx* were significantly enriched in the PRpr population when comparing PRpr to  
212 their sister RGC (Supplementary Figure 3 C). While *crx* is linked to PR differentiation and its  
213 knockdown leads to PR degeneration<sup>56,55</sup>, *prdm1a* is involved in PR fate specification<sup>50,57</sup>. A  
214 mouse knockout of *prdm1a* led to a reduction in the number of PRs<sup>50,58</sup>, without severe  
215 consequences on tissue development. Further, our transcriptomics analysis showed that  
216 *Prdm1a* expression is specific to PRprs (Supplementary Figure 3 D). Taking these findings into  
217 account, we decided to use a previously established *Prdm1a* morpholino knockdown approach  
218 to interfere specifically with the emergence of PRprs<sup>59,60</sup>. We found that *Prdm1a* morphant  
219 retinas appeared smaller than controls at 48 hpf (Figure 2 A) and showed more severe  
220 microphthalmia by 72 hpf (Figure 2 B, E, N = 12 embryos). While control embryos at 48 hpf  
221 feature a layer of Ath5<sup>+</sup>Crx<sup>+</sup> photoreceptors at apical positions, this layer is missing in most

222 of the Prdm1a morphants (Figure 2 A, A'). At 72 hpf a layer starts to form, but it is mostly  
223 occupied by Crx- and Zpr1-negative cells, confirming a significant reduction in PR production  
224 (Figure 2 B, B', N = 10 embryos). In extreme cases we found a total depletion of this cell layer  
225 (3/10 embryos, Figure 2D). Further, an overall reduction of retinal thickness, mostly due to  
226 shrinkage of the outer nuclear layer (ONL) and of the ganglion cell layer (GCL) was observed  
227 (Figure 2 C, D, N = 4 embryos (control), 6 embryos (Prdm1a morphant)) as well as a reduction  
228 in retinal diameter compared to controls (Figure 2 E, N = 7 embryos (control), 10 embryos  
229 (Prdm1a morphant)).

230 Together, these results indicated that overall tissue architecture was compromised upon  
231 inhibition of PRpr emergence.

232

233 We next set out to understand how the outcome of Atoh7+ progenitor divisions changed  
234 upon inhibition of PRpr emergence. Possibilities included a fate switch to other neuronal fates,  
235 differentiation into a different cell type or progenitors skipping this division completely and  
236 directly generating one neuron. 20 divisions Atoh7+ progenitor divisions from three embryos  
237 were followed in the early neurogenic window in Prdm1a morphants as established in controls.  
238 This revealed that in 2/20 cases Atoh7+ cells did not divide but differentiated directly, one  
239 generating an RGC (Supplementary Figure 3 E) and one generating an inhibitory neuron (AC,  
240 Supplementary Figure 3 F). One division produced an RGC and a PRpr as seen in controls.  
241 Most divisions (17/20), however, generated an RGC or an inhibitory neuron as seen in controls,  
242 and a sister cell that initially showed PRpr-like unipolar morphology during basal migration  
243 (Figure 2 F, Video 2)<sup>34</sup>. Afterwards, this cell extruded a dynamic basal process and positioned  
244 itself apically (Figure 2 F-G) a phenomenon never observed in controls. Upon >15h of imaging,  
245 these cells did not acquire any previously observed neuronal morphology and their basal  
246 process did not establish a basal attachment (Figure 2 F, compare with Figure 1 B-E).

247 Thus, interference with the deterministic part of the lineage resulted in lineage and  
248 tissue morphology defects, possibly due to the production of a non-canonical sister cell of  
249 unknown state from Atoh7+ progenitor divisions. These results also indicate that PRprs are  
250 committed to the PR fate and cannot revert to a multipotent state to produce a different,  
251 functional cell type when the PR fate cannot be acquired.

252

253

254



255 **Lineage topology is not affected by interference with the probabilistic lineage branch**

256 Interference with the emergence of PRprs led to severe defects in lineage progression.  
257 To understand whether similar constraints in progenitor competence and potency occurred in  
258 the probabilistic branch of the lineage, we used knockdown approaches to suppress the  
259 emergence of RGCs, inhibitory neurons or both. Particularly, we used established morpholinos  
260 against the two bHLH pro-neural transcription factors *Atoh7* (prevents RGC fate  
261 specification<sup>61</sup>) and *Ptf1a* (prevents amacrine and horizontal cell fates<sup>33</sup>). Despite the absence  
262 of one or two retinal populations, retinal thickness did not significantly change in *Atoh7* and  
263 *Ptf1a* morphants (Figure 3 A, B, Table 1). This is consistent with the minimal defects  
264 previously observed at the tissue level in *Atoh7* and *Ptf1a* morphants<sup>62,63</sup>. Analysis of the  
265 thickness of different layers showed that the observed conserved retinal size could result from  
266 size changes at the level of the different neuronal layers: in *Atoh7* morphants, a significant  
267 reduction in GCL thickness was counteracted by a thickness increase of the inner nuclear layer  
268 (INL) and ONL (mean, SD and p values for the different conditions in Table 1); in *Ptf1a*  
269 morphants, the absence of ACs and HCs lead to a reduction in the thickness of the INL but  
270 showed increased GCL and ONL thickness (Figure 3 B, Table 1).

271 Even in double *Atoh7/Ptf1a* morphants, in which RGCs, ACs and HCs were missing,  
272 only a minor reduction in retinal thickness was observed, mainly due to shrinkage of the GCL  
273 (Figure 3 B, Table 1), as previously proposed<sup>62</sup>. This showed that upon interference with the  
274 probabilistic branch of the lineage, retinal thickness and lamination were generally maintained  
275 even in the absence of one or more neuronal cell types. This apparent tissue size robustness is  
276 accompanied by changes in the thickness of single layers, suggesting changes in the  
277 proportions of neuronal output of progenitor divisions.

278 One previously suggested possibility that could explain the changes in neuronal  
279 proportions was that, in the absence of pro-neural factors as *Atoh7*, progenitors would go  
280 through an additional round of cell division to then produce late-born neurons<sup>23,24,64</sup>. If this was  
281 the case, a higher number of progenitors dividing at the onset of neurogenesis would be  
282 expected. This would lead to changes in the number of progenitor divisions and in the lineage  
283 branching structure, here referred to as *lineage topology*. To understand whether lineage  
284 topology changed upon knockdown of the pro-neural transcription factors *Atoh7* and *Ptf1a*, we  
285 used the mitotic marker PH3 and assessed the number of PH3+ cells at 28, 32 and 36 hpf in  
286 single *Atoh7* and *Ptf1a* morphants and in *Atoh7/Ptf1a* double morphants. Interestingly, no  
287 major difference in the number of mitotic progenitors was observed in the four conditions over  
288 development (Figure 3 C). We then followed single *Atoh7*+ progenitors divisions in the three

289 morphant conditions (the *Atoh7* morpholino blocks only the expression of the protein, not the  
290 reporter) (n = 290 divisions, N = 24 embryos) and found that these divisions never produced  
291 an additional *Atoh7*<sup>+</sup> progenitor (Figure 3 D), indicating that the absence of the pro-neural  
292 factors *Atoh7* and *Ptfla* did not delay neuronal production. Further, plotting the developmental  
293 time of each neurogenic division showed that the temporal distribution of neurogenic divisions  
294 was similar in control and single morphant conditions, with only a slight delay in the double  
295 morphants (Supplementary Figure 4 A). This suggested that knockdown of pro-neural genes  
296 neither affects the topology of progenitor lineages nor the timing of neurogenic entry.

297

### 298 ***Atoh7*<sup>+</sup> progenitors restrict competence without losing potency**

299 To understand how the outcome of *Atoh7*<sup>+</sup> divisions changed upon interference with  
300 the likelihoods of different neuronal fates, we analysed the possibilities and constraints of  
301 *Atoh7*<sup>+</sup> progenitors fate decisions in different morphants. Interestingly, independently of the  
302 morphant condition (n = 290 divisions, N = 24 embryos), all *Atoh7*<sup>+</sup> progenitor divisions  
303 nevertheless produced one PRpr and a neuronal sister cell (Figure 3 D), as seen in controls.  
304 Thus, while the deterministic PRpr fate remained unchanged, the sister cell acquired one of the  
305 other available fates with different probabilities (Figures 3D-F). This is consistent with the  
306 previously proposed ‘fate switch’ hypothesis<sup>33,63</sup>. Differently from what was seen in controls  
307 however, symmetric divisions producing two PRpr (and consequently four PRs) occurred in  
308 all morphant conditions (Figure 3 D, G, Video 3). This could explain the increased thickness  
309 of the PR layer observed in all morphants (Figure 3 B). Furthermore, in double morphants in  
310 which neither RGC nor IN fates were available, divisions producing one PRpr and one BC  
311 (Figure 3 D, H, Video 3) appeared. As BCs usually do not emerge from *Atoh7*<sup>+</sup> progenitor  
312 divisions (Figure 1 and Supplementary Figure 2), these results indicated that *Atoh7*<sup>+</sup>  
313 progenitors generally have the potency to produce BCs but are not competent to generate them  
314 when *Atoh7* and *Ptfla* are expressed. The broad spectrum of possibilities for *Atoh7*<sup>+</sup>  
315 progenitors fate decisions further suggested that during normal development *Atoh7*<sup>+</sup>  
316 progenitors remain multipotent, while their competence is constrained.

317 In controls, the likelihood that the probabilistic branch of *Atoh7*<sup>+</sup> progenitor divisions  
318 acquired certain neuronal fates changed over development. RGCs were more likely produced  
319 at early stages while inhibitory neurons became more prevalent later (Figure 1 H, I). To  
320 understand whether and to what extent these proportions were affected in the different  
321 morphant conditions, the outcome of *Atoh7*<sup>+</sup> progenitor divisions was analysed over time. In  
322 *Atoh7* morphants (n = 98 divisions, N = 8 embryos), we observed an increase in the proportions

323 of division giving rise to IN, from 19.2% in control to 41.4% (CI = [15.9% , 56.8%]), Figure  
324 3E) at early developmental stages. In addition, and unobserved in controls, divisions giving  
325 rise to a second PRpr (58.586%, CI = [43.2%, 84.1%], Figure 3 E, G) appeared. During later  
326 neurogenesis stages, the proportions of divisions producing an IN remained invariant compared  
327 to controls (57.1% in control vs 60.6%, with CI = [42.0%, 78.8%] in *Atoh7* morphant, Figure  
328 3F) but the proportions of divisions that would have produced RGCs in controls, now produced  
329 a second PRpr (38.1%, with CI = [21.2%, 53.2%]) (Figure 3F).

330 In *Ptf1a* morphants, (n = 80 divisions, N = 9 embryos) the proportion of divisions that  
331 would have produced an IN in controls produced a second PRpr (12.6% with CI = [1.9%,  
332 19.7%]) at early stages (Figure 3 E), while the production of RGCs remained invariant  
333 compared to controls (80.8% in control vs 87.4% with CI = [80.3%, 98.1%] in *Ptf1a* morphant,  
334 Figure 3 E). However, at later stages the proportions of RGCs increased with respect to controls  
335 (from 42.9% to 77.7% with CI = [67.2%, 96.1%]), indicating that the window of RGC  
336 formation is extended in this condition (Figure 3 F). This prolonged production of RGCs could  
337 also explain the increased RGC layer thickness observed (Figure 3 B). In double morphants (n  
338 = 112 divisions, N = 7 embryos), bipolar cells were produced throughout the entire neurogenic  
339 window (Figure 3 F, H). This is interesting for two reasons, a) they were never produced by  
340 the *Atoh7* lineage in control embryos (Figure 1, Supplementary Figure 2), and b) they usually  
341 start emerging only at later developmental stages from 45 hpf<sup>43</sup>.

342 Together, these results indicated that *Atoh7*<sup>+</sup> progenitor competence and potency are  
343 extended in morphant conditions when compared to controls. Our data showed that these  
344 progenitors can in principle generate all retinal neuronal fates and that these fates can be  
345 produced even outside their canonical temporal window. These experiments also reinforced  
346 the finding that deterministic and probabilistic fate decisions co-exist in the same lineage, as  
347 the deterministic PRpr production was not altered in any of these morphant conditions.

348

### 349 **A simple theoretical Gene Regulatory Network can explain temporal changes in** 350 **progenitor competence**

351 Our transcription factor (TF) knockdown experiments revealed an unexpectedly broad  
352 spectrum of possibilities for fate decisions in the probabilistic branch of the lineage. Previous  
353 studies suggested that interactions between the pro-neural TFs in the retina in the form of gene  
354 regulatory networks (GRN) influence the proportions of different neuronal fates within a  
355 clone<sup>32,33</sup>. We thus set out to use the lineage data obtained from the knockdown experiments to  
356 develop a minimalistic stochastic model capturing possible interactions between *Atoh7*, *Ptf1a*,

357 and *Prdm1a*. This model used the morphant data to probe whether a simple GRN based on  
358 interactions between these transcription factors could explain the temporal changes in  
359 progenitors' competence observed in control conditions.

360 Event plots were generated for *Atoh7*, *Ptf1a* and *Atoh7/Ptf1a* morphants conditions  
361 (Figure 4 A, Supplementary Figure 4B) and the distribution of fate outcomes was renormalised  
362 time-point wise by the distribution of all neurogenic division events. This allowed us to  
363 calculate the probability of different neuronal fates for a given division occurring at a certain  
364 time, which revealed the fate share changes over development (Figure 4 B). We found that  
365 when *Ptf1a* is knocked down, the likelihood of RGC production remained constant over time.  
366 Conversely, the production of INs was only slightly changed upon *Atoh7* knockdown. We thus  
367 hypothesized that, as previously proposed by Jusuf et al.<sup>33</sup>, *Ptf1a* could have an inhibitory effect  
368 on *Atoh7*, while *Atoh7* had no inhibitory effect on *Ptf1a*. As bipolar cells emerged from *Atoh7*+  
369 divisions only when both *Atoh7* and *Ptf1a* were depleted (Figure 3 E, F, H), we further  
370 hypothesized that expression of either of these genes was sufficient to inhibit bipolar cell  
371 transcription factors such as *Vsx1*. The fact that a second PRpr is generated in all morphant  
372 scenarios (Figure 3 E-G) made us add the assumption that PR genes were inhibited by the  
373 expression of *Atoh7* and/or *Ptf1a*.

374 As the knockdown of either *Atoh7* or *Ptf1a* or both did not alter overall lineage topology  
375 (Figure 3 C, D, Supplementary Figure 4 A), but only affected fate decisions at the terminal  
376 point of the lineage, our model neglected the number of progenitor divisions that occurred  
377 before neurogenesis onset.

378 All above stated assumptions were implemented in a phenomenological stochastic  
379 model to test whether a hypothetical GRN based on the morphant lineage data could predict  
380 the temporal dynamics of fate decisions observed in control conditions. In the model, noise  
381 came from the base levels of transcription factor expression<sup>65-68</sup> and the inhibitions were  
382 modelled considering the presence of a threshold level of expression of each factor. If the  
383 expression level of a TF was above the threshold, then the inhibition took place on its target  
384 TFs. To model the time-evolution of fate probabilities of experimental data, we considered that  
385 TF levels change during development, as previously shown<sup>69</sup>. Interestingly, assuming that only  
386 *Ptf1a* increased its expression over time<sup>69</sup> was sufficient to completely reproduce the temporal  
387 changes of fate probabilities (see Methods for details).

388 By considering this GRN and implementing a simple effective inhibition (Figure 4 C),  
389 the simulation recapitulated the double morphant condition well (compare Figure 4 C right  
390 panel with 4 B right panel) but failed to recapitulate the fate outcome and the changes in fate

391 shares over time in the single morphant conditions (compare Figure 4 C middle and left panels  
392 with 4 B middle and left panels). In particular, the simulation showed the presence of divisions  
393 generating a BC also in single morphants for *Atoh7* and *Ptf1a*, an outcome not observed in our  
394 experiments. When generating a prediction for the control condition using this model GRN,  
395 the simulation predicted that BCs and a second PRpr could be generated (Figure 4 F,  
396 Simulation A). However, this was not found in our experimental dataset (Figure 4 E, Figure 1,  
397 Supplementary Figure 2).

398 When the inhibition mode of the model was amended to a *joint inhibition*, i.e.,  
399 considering all inhibitors of a given target to sum their levels to reach the threshold, while  
400 keeping all other parameters constant (Figure 4 D), the model faithfully recapitulated the fate  
401 shares and the temporal dynamics of fate decisions in all morphant conditions (compare  
402 probabilities estimation in Figure 4 D with Figure 4 B). Further, and most importantly, the  
403 simulation based on this second GRN also correctly predicted the temporal changes of fate  
404 shares in the control condition (Figure 4 F, Simulation B), including the lack of bipolar cells  
405 production and the absence of symmetric divisions generating two PRpr (compare Figure 4 E  
406 with Figure 4 F Simulation B).

407 Thus, a simple GRN based on the fate probabilities observed in our knockdown  
408 experiments can recapitulate the temporal changes in neuronal proportions in control retinas.  
409 This suggests that seemingly complex temporal shifts in progenitor competence observed  
410 during neurogenesis could originate from a simple gene regulatory pattern in a noisy  
411 environment. In principle, this means that such a simple GRN could be sufficient to achieve  
412 the observed fate shares during development from multipotent *Atoh7*<sup>+</sup> progenitors.

413

## 414 **Discussion**

415 In this study we investigated the possibilities and constraints of Atoh7+ progenitor neurogenic  
416 fate decisions during zebrafish retinal development.

417 Analysis of the output of single progenitor divisions revealed that two different types of fate  
418 decisions, deterministic and probabilistic, co-exist in the same lineage and that these are  
419 characterized by different probability distributions. We further find that upon interference with  
420 these different fate decisions, the lineage responds differently depending on which branch is  
421 affected. Upon interference with PRpr emergence, the deterministic lineage branch does not  
422 produce physiologically observed fates. This contrasts with what is observed upon interference  
423 with the more probabilistic lineage branch, where a broader spectrum of fate outcomes was  
424 observed even compared to the control scenario.

425 Stochastic modelling of the fate outcome of the probabilistic branch in perturbed conditions let  
426 us propose a GRN that predicts the temporal changes in progenitor competence in controls.  
427 This simple GRN was based on the observed changes in fate probabilities and explained the  
428 temporal production of different retinal neurons in the right proportions during development.  
429 It is thus tempting to speculate that the “fate plasticity” unravelled in this study could be  
430 important for robust tissue development.

431  
432 To date, fate decisions in the vertebrate CNS have mostly been investigated at the clonal or the  
433 population level. Depending on the techniques used and interpretation of the data, fate  
434 decisions were considered either mostly driven by stochasticity<sup>23–26</sup> or by deterministically  
435 encoded programs in each progenitor cell<sup>22,70–72</sup>. Our quantitative analyses of single progenitor  
436 divisions and their neuronal output over development shows that both deterministic and  
437 stochastic fate decision co-exist in the same progenitor lineage. In the case of the Atoh7+  
438 progenitors, PRpr are always and continuously produced during development in one branch of  
439 the lineage, while the sister cell acquires different fates with time-dependent probabilities. Our  
440 analysis revealed stereotypic lineage patterns among the general stochasticity in fate decisions:  
441 while neuronal fate decisions in one branch of the lineage follow a probability distribution that  
442 changes over time, the other branch always and reliably produces one PRpr and consequently  
443 two PRs. This adds to the previously proposed stochastic model, in which all neuronal fates  
444 are decided according to a set of different probabilities<sup>23,24</sup>.

445 We further found that in controls the Atoh7+ progenitors always produced neurons and  
446 committed precursors, but never a self-renewing Atoh7+ progenitor (Figure 1). This is different  
447 from the *Drosophila* CNS and the vertebrate neocortex, where asymmetric divisions produce

448 one neurogenic cell and one renewing progenitor or Radial Glia<sup>73,74</sup>. These renewing  
449 progenitors change competence during development, producing different neuronal types in  
450 each round of division. We here show that in the zebrafish retina neuronal fate decisions occur  
451 at the terminal tips of the lineage. Furthermore, our interference experiments disclosed that in  
452 principle Atoh7+ progenitors have the potency to produce all neuronal types (Figure 1, Figure  
453 3) and that their competence windows can extend to earlier or later developmental times  
454 (Figure 3 E, F). This suggests that different mechanisms regulating the temporal production of  
455 different neuronal types could be at play in the zebrafish retina from what is known in  
456 *Drosophila*<sup>9</sup>. It would be interesting to investigate whether the absence of self-renewing  
457 divisions and the presence of lineage patterns that consistently generate one committed PR  
458 precursor is specific to the zebrafish retina, possibly due to fast embryo development, or  
459 whether it is also found in other areas of the CNS including in other species. Fate-restricted  
460 progenitors have been found in the mouse retina<sup>75</sup> and in the brain neocortex<sup>76,77</sup> and it would  
461 therefore be interesting to investigate whether these progenitors arise from lineage patterns  
462 similar to those found in this study. Studies like this would enhance our understanding of  
463 similarities between different CNS areas and species and unveil core principles or differences  
464 of those of lineage progression in neural systems.

465 When we probed the possibilities and constraints of the deterministic and probabilistic  
466 fate decisions, interference with the deterministic PR fate affected overall tissue integrity and  
467 lineage topology. Interestingly, upon interference with the probabilistic fate decision, Atoh7+  
468 progenitors often generated a second PRpr, a fate not observed in controls for the sister cell.  
469 This suggests that generating at least one PRpr is also important for retinal integrity.  
470 Consequently, the PR fate could be a “default state” for neurogenesis outcome. This is an  
471 attractive idea also in evolutionary terms as PR cells are widespread throughout evolution<sup>78</sup>  
472 and are thought to be the first retinal cell types that evolved<sup>78,79</sup>. It is therefore possible that the  
473 other cell types evolved “on top” of a general PR program as proposed by Constance Cepko in  
474 2014 and Detlev Arendt in 2003<sup>22,78</sup>. Currently, this is however purely speculative.

475 Interestingly, in contrast to the deterministic branch, interference with the probabilistic  
476 branch of the lineage showed a widened spectrum of fate possibilities for Atoh7+ progenitors.  
477 Here, neurons that in controls were mainly produced at early stages were also born later. This  
478 finding is in line with previous reports in the RP2/sib neuroblast lineage in *Drosophila*, where  
479 it was shown that progenitors exhibit temporal plasticity and can give rise to early lineages at  
480 later stages<sup>80</sup>. Furthermore, in double Atoh7/Ptfla morphants, BCs were seen to arise from the  
481 Atoh7 lineage, an outcome never observed in controls. In this case, these usually late-born

482 neurons appeared earlier than normally observed (Figure 3E). This indicates that Atoh7+  
483 progenitors' can generally produce any neuronal fate at any time, challenging the idea that  
484 retinal progenitor cells can give rise to certain fates only during fixed competence windows<sup>22</sup>.

485 Overall, the fact that the deterministic and probabilistic lineage branches show different  
486 fate outcome possibilities suggests that different molecular mechanisms might act to specify  
487 the PRpr vs the sister cell fate. Modelling the fate probabilities observed upon TF knockdown  
488 revealed a network of TF interactions that follows these rules of fate decisions. This simple  
489 GRN (Figure 4D) featuring Atoh7, Ptf1a and Prdm1a was able to recapitulate temporal changes  
490 of the probabilities of generating different fates in the morphant conditions and to accurately  
491 predict the changes in progenitor competence in control conditions. We are aware that the  
492 scenarios that allowed us to induce fate probability changes were rather artificial, as we  
493 suppressed one or more neuronal populations. However, the fact that the lineage reacted to  
494 such perturbations with an unexpected broad spectrum of fate possibilities makes us speculate  
495 that such lineage flexibility could underlie the presence of plasticity in fate decisions during  
496 normal development. As modelling the changes in fate probabilities predicted the temporal  
497 changes in progenitors fate decisions in the control scenario, it is possible that fate plasticity  
498 could exist to ensure progenitors competence changes during development. However, it is  
499 important to note that the model presented here is only one possible scenario. Further, this  
500 model can currently not clarify whether the included TFs act directly or indirectly, nor whether  
501 further TFs are involved. Thus, additional investigations involving ChIP-sequencing and  
502 timely-controlled overexpression studies are needed.

503 In contrast to the probabilistic fate decisions, the deterministic PR fate decision does  
504 not seem to rely on the same GRN, as interference with Prdm1a expression does not result in  
505 a fate switch (Figure 2 F, G). This suggests that the PR fate might be acquired through a  
506 different mechanism. As a PRpr is reproducibly produced from each Atoh7+ division, one  
507 possibility is that fate determinants specifying the PR fate are asymmetrically inherited by the  
508 cell that becomes a PRpr. This is a widespread strategy employed by different systems in which  
509 asymmetric fate decisions occur, like in the *Drosophila* neuroblast<sup>9,73</sup> or in the mouse retina<sup>81–</sup>  
510 <sup>83</sup>. Transcriptomics analysis combined with advanced live imaging techniques will be needed  
511 to find key regulators of this fate decision.

512 Overall, our study contributes to the understanding of possibilities in lineage decisions  
513 in the retina and revealed different degrees of flexibility for different types of fate decisions.  
514 Such studies combined with theoretical modelling are important to appreciate and interpret the



515 clonal and molecular data available and thereby understand the core principles of reproducible  
516 organ formation.

517

518

519

520

521

522

523

Figure 1

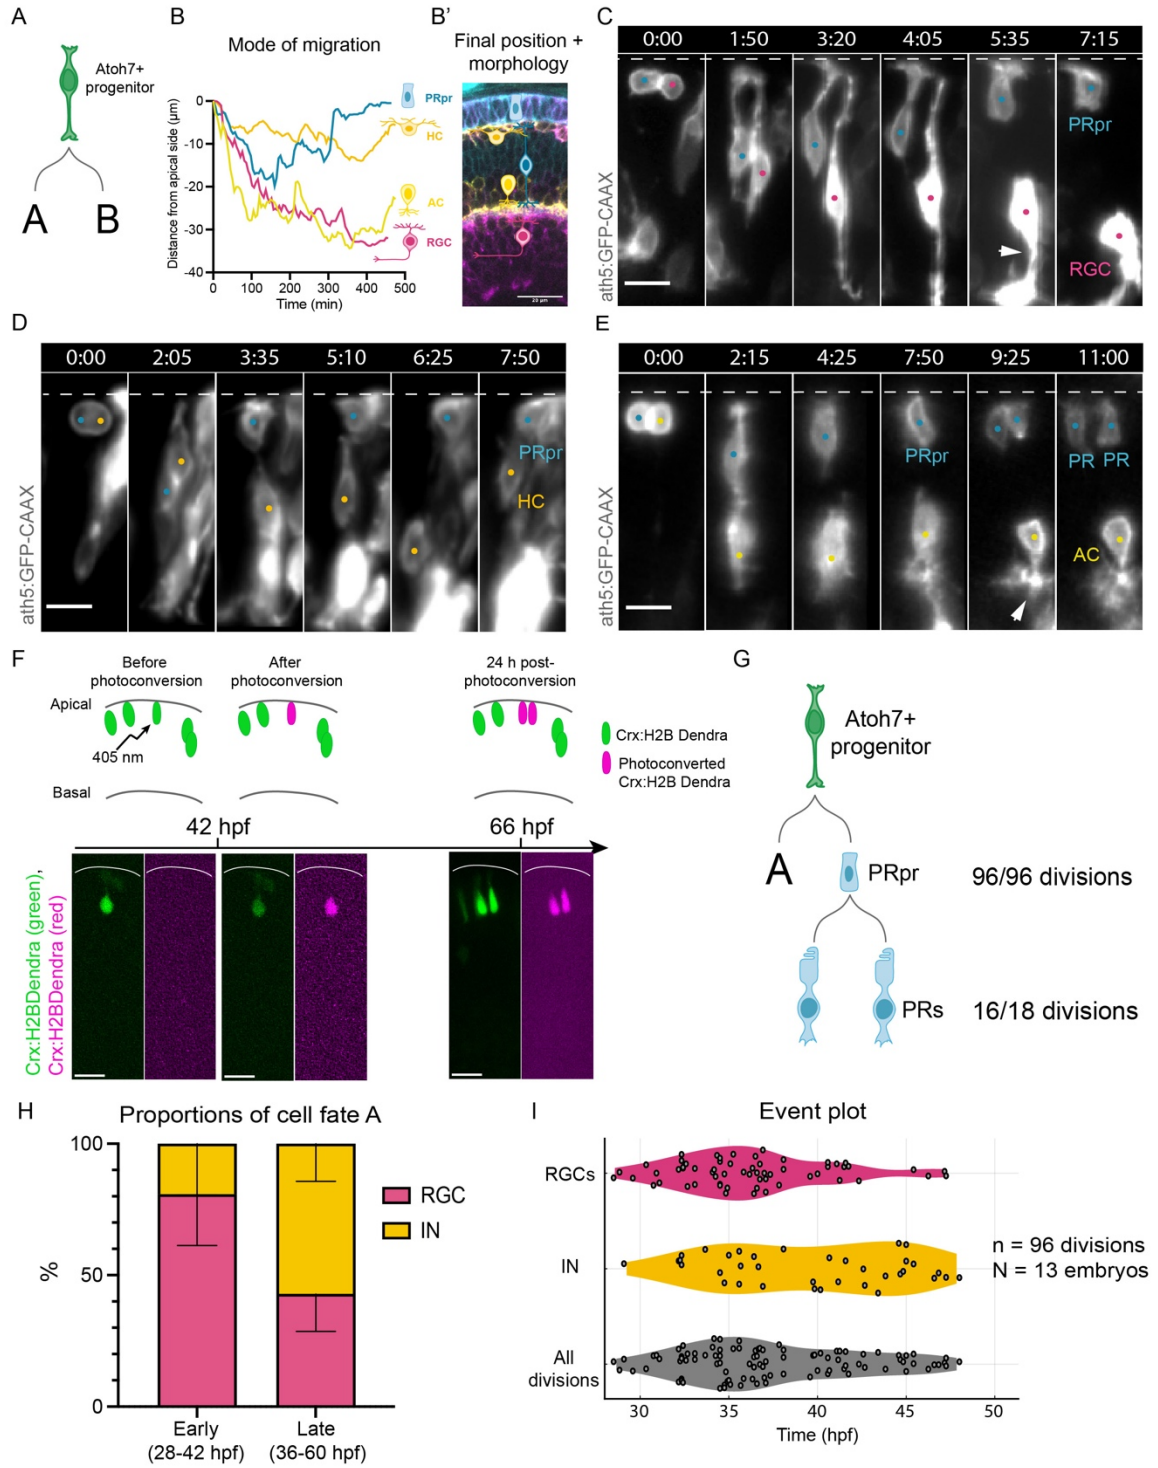

524

525

526

527

528

529

530

531 **Figure 1. Atoh7+ progenitors divide asymmetrically to produce a PRpr and a sister cell**

- 532 A) Schematic of Atoh7+ divisions. The focus of this study is to find out what daughter  
533 cells are generated in branch A and B and the spectrum of fate decision possibilities of  
534 Atoh7+ progenitors.
- 535 B) Cell fate assignment strategy based on mode of migration. The plot indicates typical  
536 movement trajectories for each cell type. B') Cell fate assignment strategy based on  
537 morphology and final neuronal position in the laminated retina.
- 538 C) Montage of Atoh7+ progenitor division generating an RGC (magenta dot) and a PRpr  
539 (cyan dot). Dashed line indicates the apical side, arrowhead points to RGC axon.  
540 ath5:GFP-CAAX (Atoh7, grey), scale bar 10  $\mu$ m.
- 541 D) Montage of Atoh7+ progenitor division generating an HC (orange dot) and a PRpr  
542 (cyan dot). Dashed line indicates the apical side. ath5:GFP-CAAX (Atoh7, grey), scale  
543 bar 10  $\mu$ m.
- 544 E) Montage of Atoh7+ progenitor division generating an AC (yellow dot) and a PRpr  
545 (cyan dot). Dashed line indicates the apical side, arrowhead points to basal dendrites.  
546 ath5:GFP-CAAX (Atoh7, grey), scale bar 10  $\mu$ m.
- 547 F) Photoconversion experiment. A 405 laser was used to photoconvert isolated cells  
548 labelled with Crx:H2BDendra at 42 hpf. 24 hours after photoconversion,  
549 photoconverted PRs were assessed. (Top) Schematic of the experiment, (bottom)  
550 representative images of the different steps of the experiment. Crx:H2BDendra  
551 (green), photoconverted Crx:H2BDendra (magenta). Scale bar 10  $\mu$ m, white line  
552 indicates apical side of the retina.
- 553 G) Schematics of outcome of Atoh7+ divisions and PRpr divisions.
- 554 H) Distribution of fates for cell A acquired during early and late neurogenic windows. N  
555 = 13 embryos, n = 96 Atoh7+ divisions. Mean and 95% CI are indicated.
- 556 I) Event plot of all divisions analysed in (H).

557

558

559

560

561

562

563

564

**Figure 2**

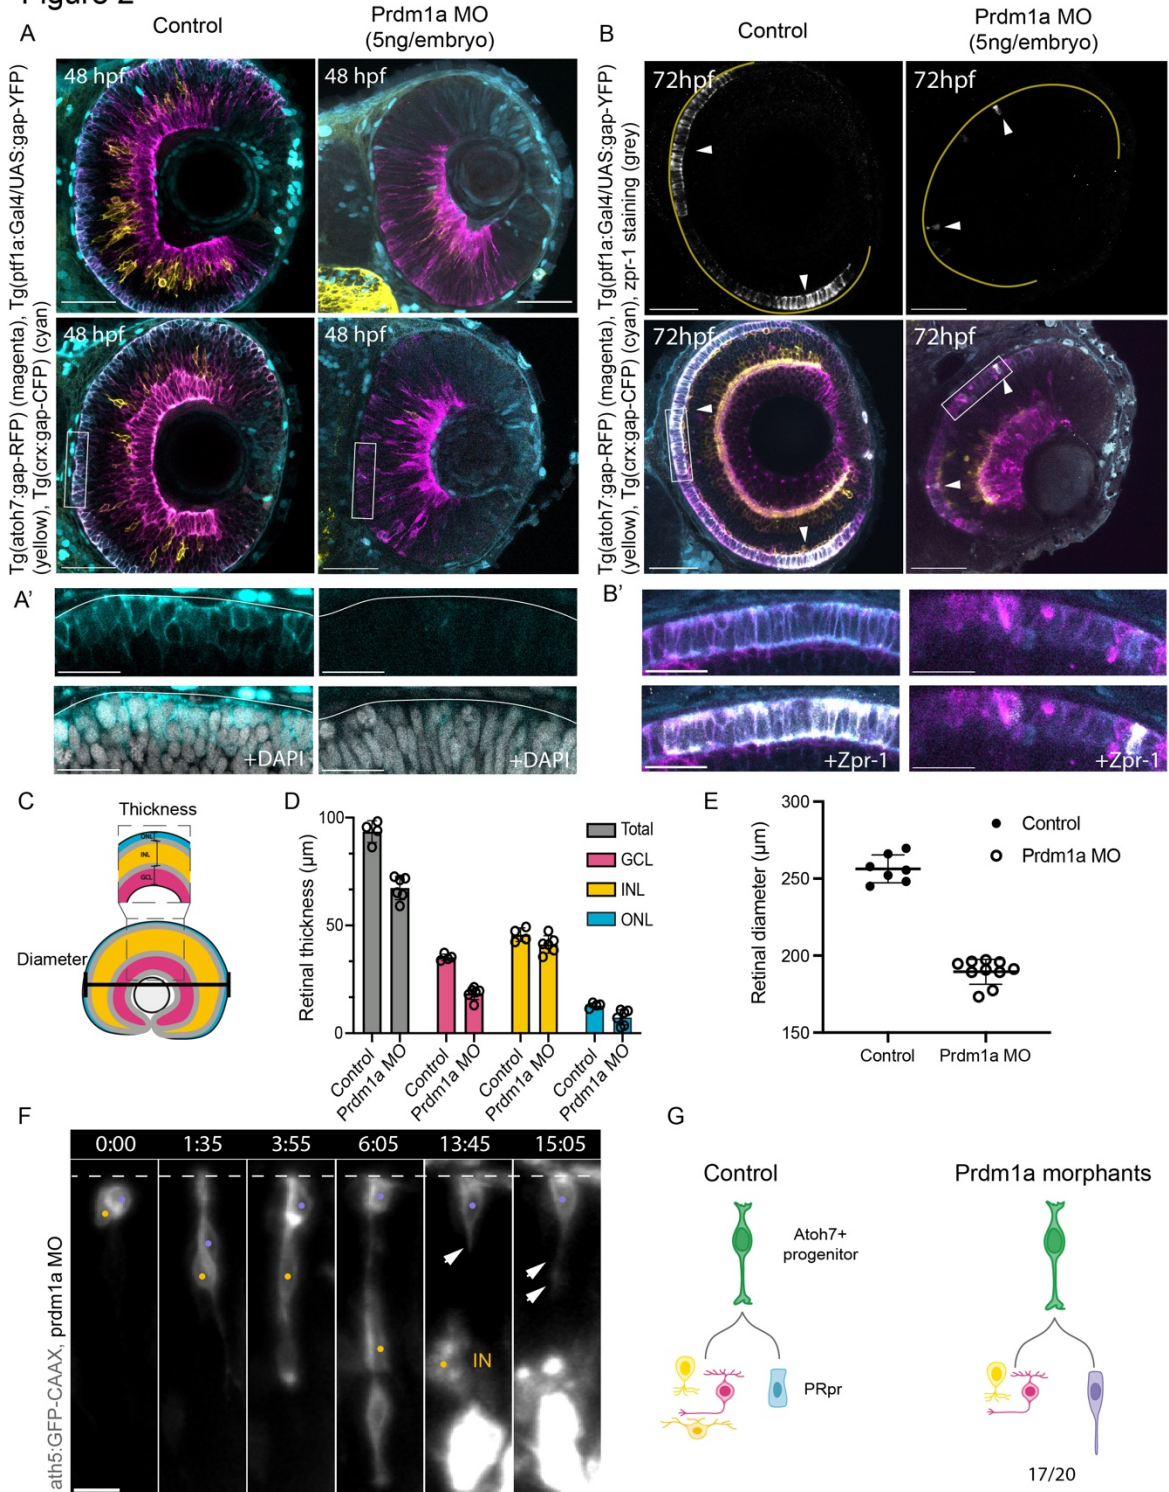

565

566

567

568

569

570

571

572 **Figure 2. Perturbing the deterministic PRpr fate decision affects lineage and overall tissue**  
573 **development**

574 A) Two examples of retinas at 48 hpf in (left) control and (right) Prdm1a morphant (MO).  
575 Atoh7<sup>+</sup> cells (magenta), inhibitory neurons (yellow) and photoreceptors (cyan) are  
576 labelled. Scale bar 50  $\mu$ m.

577 A') Close up of Crx (cyan) signal (upper panel) and DAPI (grey, lower panel) from figure  
578 A, for controls (left) and Prdm1a morphant (right). Scale bar 20  $\mu$ m.

579 B) Staining for the photoreceptor cell marker zpr-1 at 72 hpf in (left) control and (right)  
580 Prdm1a knockdown. Atoh7<sup>+</sup> cells (magenta), inhibitory neurons (yellow),  
581 photoreceptors (cyan) and zpr-1 (grey). Scale bar 50  $\mu$ m.

582 B') Close up of Atoh7 (magenta) and Crx (cyan) signal (upper panel), together with  
583 Zpr-1 (grey, lower panel) from figure B, for controls (left) and Prdm1a morphant  
584 (right). Scale bar 20  $\mu$ m.

585 C) Schematics of layer thickness and retinal diameter measurements in the central part of  
586 the retina.

587 D) Layer thickness analysis in control and Prdm1a knockdown embryos. N = 4 embryos  
588 (control), 6 embryos (Prdm1a morphant). Total thickness comparison:  $p = 0,0055$ ; GCL  
589 comparison,  $p < 0,0001$ ; INL comparison, ns; ONL comparison,  $p = 0,0369$ . Two-way  
590 Anova with Bonferroni correction. Mean and SD are indicated, as well as single values.

591 E) Measurements of retinal diameter in control (black dots) and Prdm1a knockdown  
592 (empty dots). N = 7 embryos in control, 10 embryos in Prdm1a knockdown, 2  
593 independent experiments.  $p = 0.0001$ , Kolmogorov-Smirnov test. Mean and SD are  
594 indicated, as well as single values.

595 F) Montage of Atoh7<sup>+</sup> progenitor division upon Prdm1a knockdown, generating an IN  
596 (yellow dot) and a non-canonical sister cell (violet dot). Dashed line indicates the apical  
597 side, arrows indicate the basal process of the sister cell. ath5:GFP-CAAX (Atoh7, grey),  
598 scale bar 10  $\mu$ m.

599 G) Schematic comparison of the outcome of Atoh7<sup>+</sup> progenitors in control and Prdm1a  
600 morphants.

601

602

603

Figure 3

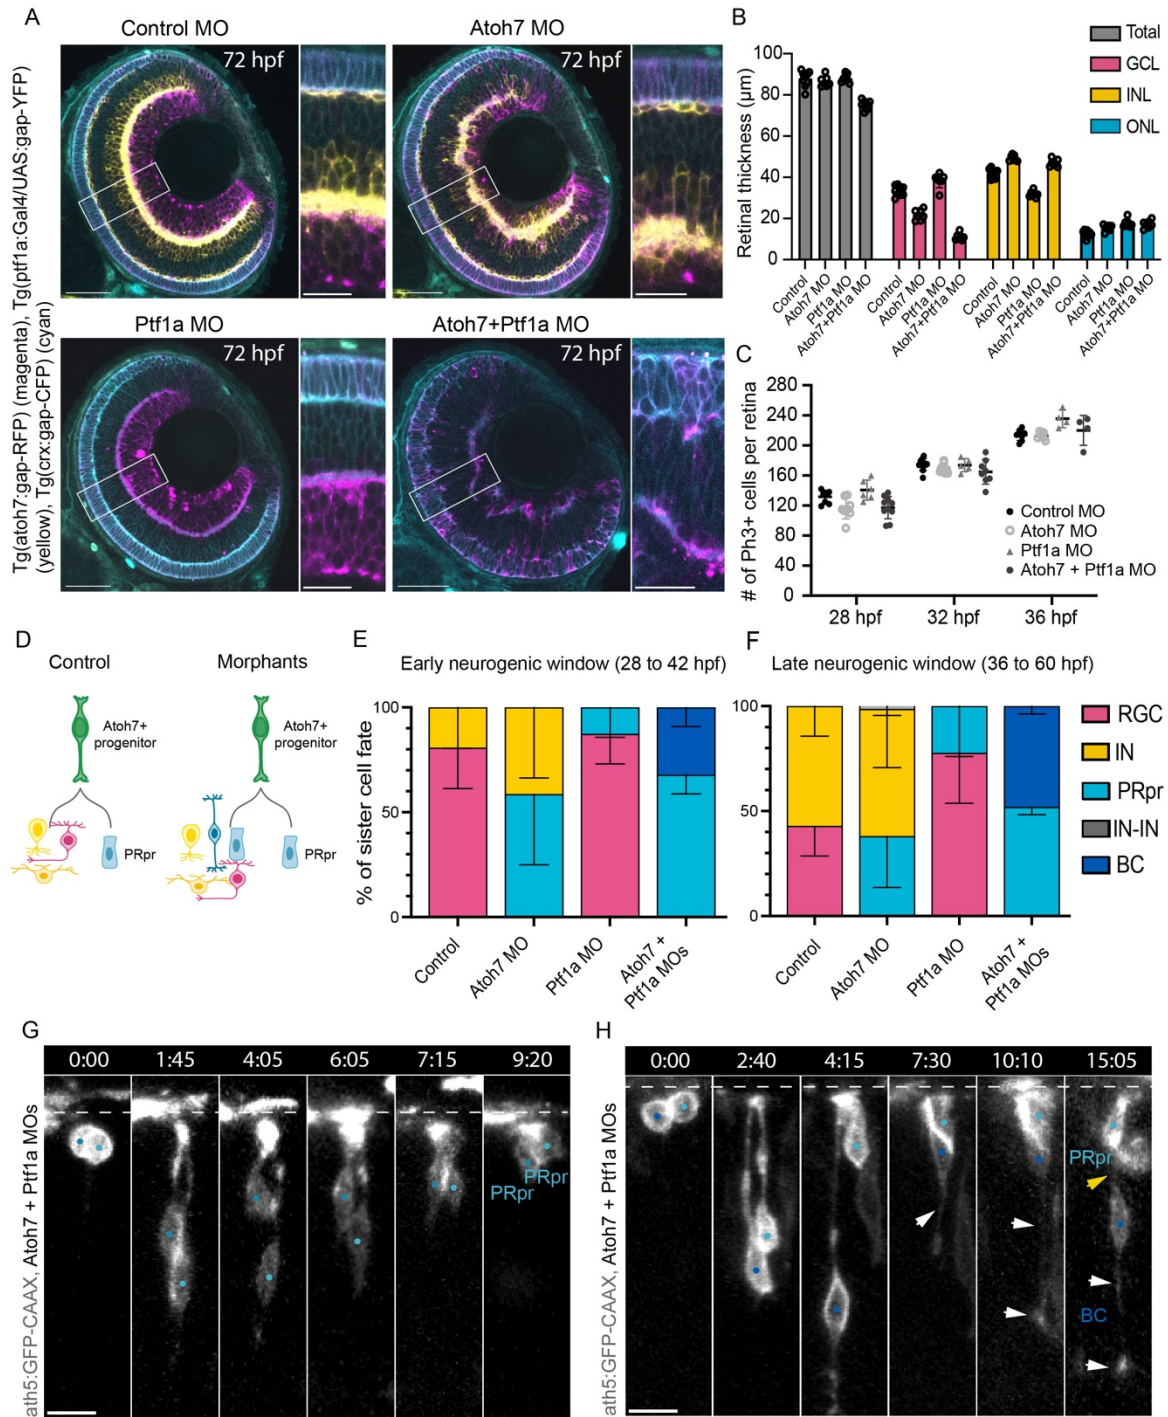

604

605

606

607

608

609

610

611

612 **Figure 3: Probabilistic lineage branch shows flexibility upon interference**

- 613 A) Retina at 72 hpf in (top left) control, (top right) Atoh7 knockdown, (bottom left) Ptf1a  
614 knockdown and (bottom right) Atoh7 and Ptf1a knockdown. Atoh7<sup>+</sup> cells (magenta),  
615 inhibitory neurons (yellow) and photoreceptors (cyan). Scale bar 50  $\mu$ m, 20  $\mu$ m in  
616 close-up panels.
- 617 B) Layer thickness analysis in control and morphant embryos. N = 9 embryos (control), 7  
618 embryos (Atoh7 morphant), 7 embryos (Ptf1a morphant), 7 embryos (Atoh7+Ptf1a  
619 morphant). p values for thickness measurements are found in Table 1. Mixed effects  
620 analysis with Bonferroni correction. Mean and SD are indicated, as well as single  
621 values.
- 622 C) Number of PH3<sup>+</sup> cells per retina in control and morphant conditions at 28, 32 and 36  
623 hpf. N = 4 to 10 embryos per condition, mixed effects analysis with Dunnett's  
624 correction. All comparisons are statistically non-significant. Mean and SD are  
625 indicated, as well as single values.
- 626 D) Schematic comparison of the outcome of Atoh7<sup>+</sup> progenitor divisions in control and  
627 morphants.
- 628 E) Proportions of PRpr sister cell fates during early neurogenesis. Mean and 95% CI are  
629 indicated.
- 630 F) Proportions of PRpr sister cell fates during late neurogenesis. Mean and 95% CI are  
631 indicated.
- 632 G) Montage of Atoh7<sup>+</sup> progenitor division upon Atoh7 and Ptf1a knockdown, generating  
633 two PRpr (cyan dots). Dashed line indicates the apical side. ath5:GFP-CAAX (Atoh7,  
634 grey), scale bar 10  $\mu$ m.
- 635 H) Montage of Atoh7<sup>+</sup> progenitor division upon Atoh7 and Ptf1a knockdown, generating  
636 a BC (blue dot) and a PRpr (cyan dot). Dashed line labels the apical side, yellow arrow  
637 points at BC apical process, white arrows point at BC basal process. ath5:GFP-CAAX  
638 (Atoh7, grey), scale bar 10  $\mu$ m.

639  
640  
641  
642  
643  
644  
645

## Figure 4

### A Event plots morphants

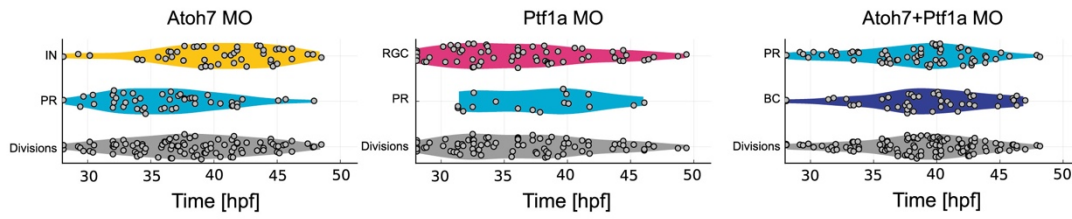

### B Probabilities estimation

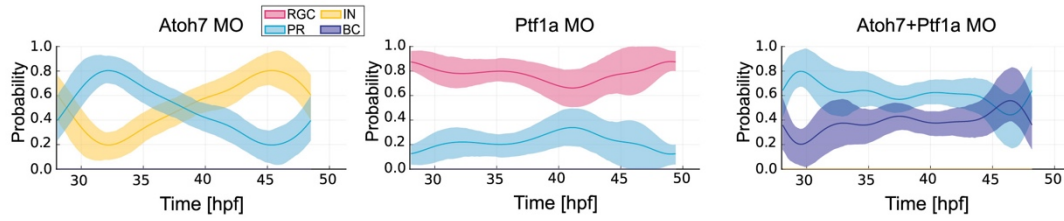

### C Simulations scenario A: simple effective inhibition

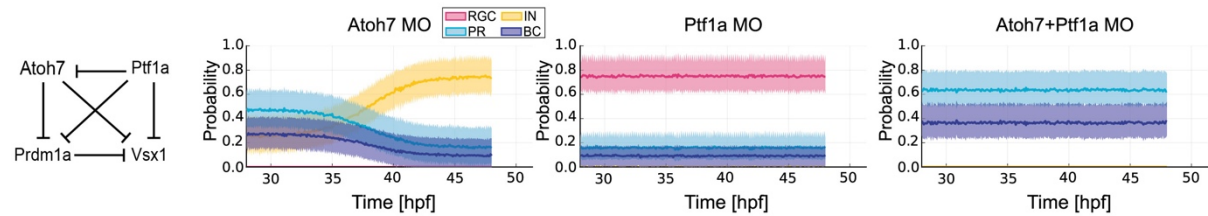

### D Simulations scenario B: effects of inhibition are summed

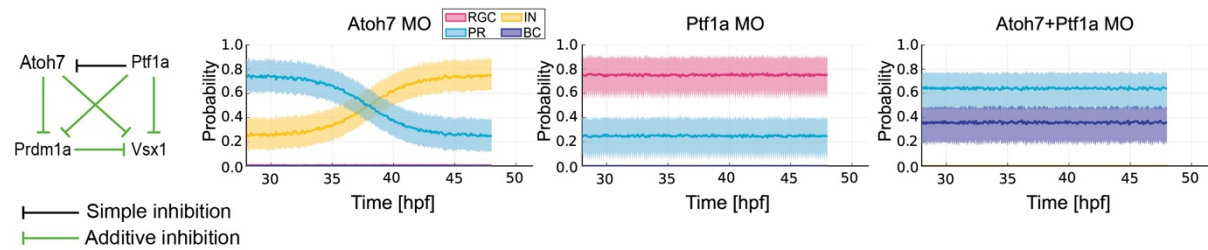

### E Probabilities estimation control

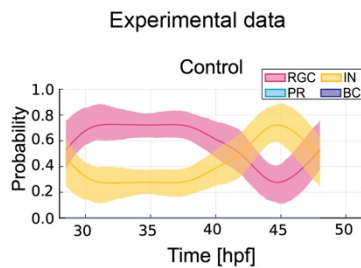

### F Predictions from simulation

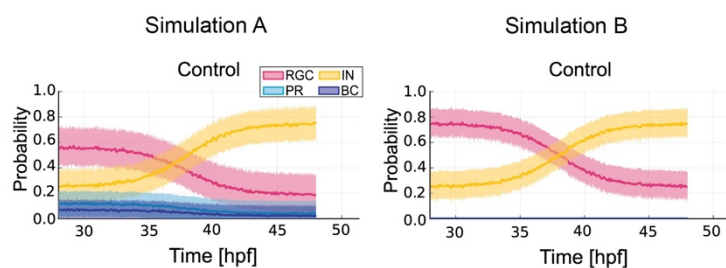

646

647

648

649

650

651



652 **Figure 4: A simple theoretical Gene Regulatory Network reproduces temporal changes**  
653 **in progenitor competence**

654 A) Distribution of each Atoh7<sup>+</sup> division in time (Event plots) from 28 hpf in Atoh7  
655 morphants, Ptf1a morphants and double Atoh7/Ptf1a morphants. Coloured violin plots  
656 indicate different fates, grey violin plots show all neurogenic divisions analysed. Time  
657 in hpf.

658 B) Probability estimation from lineage data in (A) for each fate outcome at the time at  
659 which an Atoh7<sup>+</sup> division occurs in Atoh7 morphants, Ptf1a morphants and double  
660 Atoh7/Ptf1a morphants. Time in hpf. Mean (dark line) and 95% confidence interval  
661 (thick transparent stripe) are plotted.

662 C) Simulation scenario A run using a simple GRN tested based on the hypothesis  
663 formulated based on the probability estimation plots in (B). Mean (dark line) and 95%  
664 confidence interval (thick transparent stripe) are plotted.

665 D) Simulation scenario B run using a simple GRN in which inhibitory effects of two or  
666 more TFs are summed (green lines), tested based on the hypothesis formulated based  
667 on the probability estimation plots in (B). Mean (dark line) and 95% confidence interval  
668 (thick transparent stripe) are plotted.

669 E) Probability estimation from lineage data in Figure 1I for each fate outcome at the time  
670 at which an Atoh7<sup>+</sup> division occurs in controls. Time in hpf. Mean (dark line) and 95%  
671 confidence interval (thick transparent stripe) are plotted.

672 F) Prediction of fate shares in the control situation using the Simulation scenario A (left)  
673 and the Simulation scenario B (right). Mean (dark line) and 95% confidence interval  
674 (thick transparent stripe) are plotted.

675

676

677

678

679

680

681

682

683

684

685

686 **Table 1. Layer thickness measurements for control, Atoh7-MO, Ptfla-MO and**  
687 **Atoh7+Ptfla-MO conditions.**

688

|                     | Total Thickness<br>( $\mu\text{m}$ ) | ONL                                | INL                                | GCL                                | N |
|---------------------|--------------------------------------|------------------------------------|------------------------------------|------------------------------------|---|
| Control             | 87.952 $\pm$ 3.857                   | 12.521 $\pm$ 1.648                 | 41.906 $\pm$ 2.243                 | 33.419 $\pm$ 2.456                 | 9 |
| Atoh7 MO            | 86.562 $\pm$ 2,518<br>(p > 0.999)    | 15.376 $\pm$ 1.533<br>(p = 0.0096) | 49.253 $\pm$ 1.432<br>(p < 0.0001) | 21.798 $\pm$ 2.530<br>(p < 0.0001) | 7 |
| Ptfla MO            | 87.904 $\pm$ 2.125<br>(p > 0.999)    | 17.561 $\pm$ 1.973<br>(p = 0.0005) | 31.836 $\pm$ 1.543<br>(p < 0.0001) | 38.367 $\pm$ 3.434<br>(p = 0.0257) | 7 |
| Atoh7 +<br>Ptfla MO | 75.263 $\pm$ 2.386<br>(p < 0.0001)   | 17.197 $\pm$ 1.878<br>(p = 0.0006) | 46.805 $\pm$ 1.822<br>(p = 0.0008) | 11.067 $\pm$ 1.643<br>(p < 0.0001) | 7 |

689

690 Mean and SD are shown for each measurement. p values of comparison with control are shown  
691 for each measurement for each morphant condition. N refers to the number of embryos  
692 analysed. Blue boxes indicate measurement that are statistically significantly different from the  
693 control condition, grey boxes indicate not statistically significant comparisons. Mixed effect  
694 analysis with Bonferroni correction for multiple comparisons.

695

696

697

698

699

700

701

702

703

704

705

706

707

708

709

710

711

712 **Materials and methods**

713

714 **Zebrafish husbandry**

715 Wild-type zebrafish were bred and maintained at 26°C. Embryos used for experimental work  
716 were raised at 21°C, 28.5°C, or 32°C in E3 medium supplemented with 0.2 mM 1-phenyl-2-  
717 thiourea (PTU, Sigma-Aldrich) from 8 hours post fertilization (hpf) to prevent pigmentation.  
718 Medium and PTU were changed daily. Animals were staged in hpf according to Kimmel et  
719 al<sup>84</sup>. All animal work was performed in accordance with European Union directive  
720 2010/63/EU, as well as the German Animal Welfare Act, and in accordance with and the  
721 Portuguese legislation (Decreto-Lei n° 113/2013).

722

723 **Transgenic lines**

724 Tg(atoh7:gap-GFP) and Tg(atoh7:gap-RFP) zebrafish transgenic lines were used to identify  
725 Atoh7+ progenitors and Atoh7+ neurons<sup>37</sup>. The Tg(crx:gap-CFP) line was used to visualize  
726 PRs and PRpr<sup>63</sup>. To visualize all different neurons and for transcriptomics, the triple transgenic  
727 line Tg(crx:gap-CFP), Tg(atoh7:gap-RFP) and Tg(ptfl1a:Gal4/UAS:gap-YFP)<sup>63</sup> was used.

728

729 **DNA injections**

730 DNA was injected at 1 cell stage to mosaically label progenitors and neurons in the retina. 1 nl  
731 of ath5:GFP-CAAX<sup>36,37</sup> plasmid was injected in each wild type or Tg(atoh7:gap-RFP) embryo  
732 in controls and in morphant conditions to label Atoh7+ progenitor cells and their progeny.

733

734 **Photoconversion**

735 The Crx:H2B-Dendra construct used to label crx+ cells for photoconversion was assembled  
736 using Gateway cloning (Thermo Fisher Scientific) based on the Tol2 kit.

737 The pME H2B-Dendra was combined with the 5' entry clone containing the Crx promoter (a  
738 kind gift from Rachel Wong) into the destination vector pTol2+pA+cmlc:eGFP R4-R3<sup>85</sup>.

739 15-30 ng/μl of the plasmid were co-injected with 2 ng of p53 MO in one-cell stage embryos.  
740 Embryos were raised until 42 hpf, mounted in agarose in 35mm glass-bottom petri dishes  
741 (Greiner Bio-One) and imaged with spinning-disk confocal. 2-3 cells per embryos were  
742 photoconverted. Isolated cells expressing Crx:H2BDendra were chosen for photoconversion  
743 according to their proximity to the apical side. After photoconversion, embryos were taken out  
744 of agarose and grown for 24 hours in a 12-well plate in E3 medium supplemented with 0.2 mM

745 1-phenyl-2-thiourea. After 24 hours, embryos were mounted in agarose again for imaging and  
746 photoconverted cells were assessed.

747

#### 748 **FACS sorting for transcriptomics**

749 For RNAseq of PRprs, RGCs and INs, retinas from a triple transgenic line containing cell-type  
750 specific reporters [Tg(*crx*:gap-CFP), Tg(*atoh7*:gap-RFP), Tg(*ptf1a*:Gal4/UAS:gap-YFP)]<sup>63</sup>  
751 were dissociated mechanically. FACS was performed using FACS Aria Fusion. The gates were  
752 adjusted for autofluorescence/background fluorescence using single transgenic and wild-type  
753 embryos. A minimum of 10,000 live cells were sorted per experiment from a pool of 25 retinas.  
754 Different neurons were sorted thanks to the expression of a different combination of markers  
755 (Supplementary Figure 3A). For transcriptome analysis, 500 cells were sorted per population  
756 from a pool of 25 retinas directly into the buffer for extraction.

757

#### 758 **RNAseq of FACS sorted zebrafish retinal neurons**

759 For each of the five biological replicates, RNA extraction of FACS sorted PRpr, RGC and INs  
760 was performed according to previously published protocol<sup>86</sup> by the Deep Sequencing Facility  
761 at the Genome Center of the Technische Universität Dresden. Data and methodological details  
762 (reverse transcription, cDNA amplification, library preparation, sequencing, and data  
763 processing) are accessible through GEO series accession number GSE194158 at NCBI.

764

#### 765 **Morpholino experiments**

766 To knock down specific genes, the following amounts of morpholinos were injected per  
767 embryo into the yolk at 1-cell stage: 2 ng p53 MO, 5'-

768 GCGCCATTGCTTTGCAAGAATTG-3' (Gene Tools, <sup>87</sup>); 4 ng *Atoh7* MO, 5'-

769 TTCATGGCTCTTCAAAAAAGTCTCC-3' (Gene Tools, <sup>61</sup>); 10 ng *Ptf1a* MO1, 5' -

770 CCAACACAGTGTCATTTTTTGTGC - 3' (Gene Tools, <sup>33</sup>); 10 ng *Ptf1a* MO2, 5' -

771 TTGCCAGTAACAACAATCGCCTAC - 3' (Gene Tools, <sup>33</sup>); 5 ng *Prdm1a* MO, 5' -

772 TGGTGTCATACCTCTTTGGAGTCTG - 3' (Gene Tools, <sup>59,60</sup>).

773

#### 774 **Drug treatments**

775 The Notch inhibitor LY411575 was dissolved in DMSO and used at a concentration of 10  $\mu$ M.  
776 An equal volume of DMSO was used for controls. Embryos were dechorionated and up to 10  
777 embryos were placed in a well of a 24-well plate, then incubated at 28 °C in the dark in E3  
778 medium. The treatment windows are specified in the figure and in the figure legend.

## 779 ***In vivo* labelling of proliferative PRprs**

780 To label proliferative PRprs, 48 hpf embryos were incubated at 4°C for 1 h in E3 supplemented  
781 with 500 µm of EdU (ClickiT-Alexa 488 fluorophore kit, Invitrogen) in 10% DMSO. After  
782 incubation, embryos were washed twice with E3 and immediately fixed overnight in 4% PFA.  
783 After antibody staining, incorporated EdU was detected according to manufacturer's protocol.  
784 Embryos were stored in PBS at 4°C until imaging.

785

## 786 **Immunofluorescence**

787 All immunostainings were performed on whole-mount embryos fixed overnight in 4%  
788 paraformaldehyde (Sigma-Aldrich) in PBS at 4°C as previously described<sup>88</sup>.

789 Embryos were washed five times for 10 min in PBS-T (Triton X-100 in PBS) 0.8%. For  
790 permeabilization, embryos were incubated with 0.25% Trypsin-EDTA in PBS on ice for  
791 different time depending on the developmental stage (10 min for 24 hpf, 28 hpf and 36 hpf, 12  
792 min for 42 hpf, 15 min for 48 hpf and 17 min for 72 hpf). Embryos were then kept on ice for  
793 30 min in PBS-T 0.8%. Blocking was performed with 10% donkey or goat serum in PBS-T  
794 0.8% for 3 h at room temperature or overnight at 4°C.

795 Embryos were incubated with the following primary antibodies for 72h at 4°C: GFP (50430-2-  
796 AP, Proteintech) 1:100, Histone H3 (phospho S28, ab10543, Abcam) 1:500 and zpr-1  
797 (AB\_10013803, zirc) 1:750.

798 Embryos were then washed 5 times for 30 min with PBS-T 0.8% and then incubated for 48  
799 hours with the appropriate fluorescently labelled secondary antibody (Molecular Probes) at  
800 1:500 and DAPI 1:1000 (Thermo Fisher Scientific). Finally, embryos were washed four times  
801 for 15 min with PBS-T 0.8% and stored in PBS at 4°C until imaging.

802

## 803 **Image acquisition**

### 804 *Confocal microscopy*

805 Fixed samples were imaged with a laser-scanning microscope (Zeiss LSM 880 Airyscan  
806 inverted or Zeiss LSM 980 Airyscan2 inverted, equipped with two PMT and one GaAsP) using  
807 the 40×/1.1 C-Apochromat water immersion objective (ZEISS). Samples were mounted in  
808 0.6% agarose in glass-bottom dishes (MatTek Corporation) and imaged at room temperature.  
809 Serial sections were acquired every 1 µm with ZEN 2011 (black edition) or Zeiss's ZEN Blue  
810 v3.0.

811

812 *In vivo light sheet fluorescent imaging (LSFM)*

813 Imaging started at 28 hpf for the early neurogenic window experiments and at 36 hpf for the  
814 late neurogenic window. Embryos were manually dechorionated and mounted in ~1mm inner  
815 diameter glass capillaries in 0.6% low-melting-point agarose as previously described<sup>38</sup>. The  
816 sample chamber was filled with E3 medium containing 0.01% MS-222 (Sigma) and 0.2 mM  
817 PTU (Sigma). Imaging was performed on a Zeiss Lightsheet Z.1 microscope equipped with  
818 two PCO Edge 4.2 sCMOS cameras (max 30 fps with 2048x2048 pixels - pixel size 6.5 µm)  
819 and with a 20x/1,2 Zeiss Plan-Apochromat water-immersion objective. Imaging was performed  
820 at 28.5 °C. Z-stacks spanning the entire retinal epithelium (70-100 µm) were acquired with 1  
821 µm optical sectioning every 5 min for 15-24 hours with double-sided illumination mode. The  
822 system was operated by the ZEN 3.1 software (black edition).

823 To confirm the effect of the morpholino injections in live imaging experiments, the absence of  
824 the optic nerve was assessed after live imaging of the Atoh7 MO condition. Embryos in which  
825 the optic nerve was present were discarded from the analysis. Embryos injected with Ptf1a  
826 MOs were grown at 28.5°C until 72 hpf after imaging, fixed in PFA and immunostained against  
827 HuC/D (A-21271, Thermo Fisher). Embryos displaying HuC/D staining in the inner nuclear  
828 layer were discarded from the analysis.

829

830 *Spinning disk imaging for photoconversion*

831 Photoconversion experiments were performed using an Andor spinning disk confocal  
832 microscope composed of Andor IX 83 stand and a CSU-W1 scan head (Yokogawa) with  
833 Borealis upgrade, equipped with a DMD Andor Mosaic module and a 405 nm  
834 photomanipulation light source. The microscope was operated via the Andor iQ software  
835 version 3.6. Embryos were embedded in 0.8% of low melting point agarose in E3 medium  
836 supplemented with 314 µg/mL of MS-222 and 0.1 M HEPES (pH 7.25) in 35-mm glass bottom  
837 Petri dish (Greiner Bio-One). The dish was filled with E3 supplemented with 120 µg/mL of  
838 MS-222. Z-stacks were acquired using Olympus UPLSAPO objective 60x 1.3 SIL and Andor  
839 iXon 888 Ultra with Fringe suppression.

840

841 **Quantitative analysis**

842 Images from live imaging experiments were cropped and averaged in ZEN Black and/or Fiji<sup>89</sup>  
843 and were corrected for drift using the Fiji plugin “Manual Drift Correction”  
844 ([https://imagej.net/Manual\\_drift\\_correction\\_plugin](https://imagej.net/Manual_drift_correction_plugin)) created by Benoit Lombardot (Scientific

845 Computing Facility, Max Planck Institute of Molecular Cell Biology and Genetics, Dresden,  
846 Germany).

847

### 848 **Cell fate assignment**

849 To identify the fate of the daughter cells of *Atoh7* expressing progenitors, single cells were  
850 followed until they reached their final position or until they acquired a distinct morphology  
851 (Figure 1B,C). Morphology was assessed by the use of the membrane marker *ath5:GFP-*  
852 *CAAX*<sup>88</sup> in combination with the transgenic line *Tg(atoh7:gap-RFP)*. PRpr fate was assigned  
853 based on unipolar morphology during migration and columnar morphology after reaching the  
854 apical side<sup>34,42,43</sup>, their bidirectional migration pattern<sup>34</sup> and final apical positioning. RGC fate  
855 was assigned based on basal position, basal somal translocation<sup>88</sup> and by the emergence of a  
856 basal axon (Figure 1C). Inhibitory neuron (ACs and HCs) fate was assigned based on  
857 multipolar migration mode<sup>45,90</sup>, absence of basal axons and by final positioning (figure 1D-E).  
858 Bipolar cell fate was assigned by bipolar morphology and nuclear positioning in the INL<sup>43,49</sup>  
859 (Figure 3H).

860

### 861 **Analysis of cell migration**

862 To generate the trajectories for each cell type in Figure 1B, cells cropped with ZEN 3.1 (Zeiss)  
863 and processed in Fiji as described above. Cells were tracked in 2D in maximum projected sub-  
864 stacks by following the centre of the cell body in Fiji using the semi-automated ImageJ plugin  
865 MtrackJ<sup>91</sup>. Tracking started at birth of each cell and ended after the cell reached its final position  
866 in the tissue.

867

### 868 **Retinal size measurements**

869 Retinal size measurements were performed manually using the Fiji line tool on 72 hpf retinas  
870 from the *Tg(ptf1a:Gal4, UAS:YFP; atoh7:gap-RFP; crx:gap-CFP)* line, in controls and in all  
871 morphant conditions as illustrated in Figure 2C.

872 Retinal diameter was measured on three different z planes per retina, and the average  
873 measurement was plotted for each replicate.

874 Retinal thickness was measured on three different z plane of the central region of the tissue,  
875 and the average measurement was plotted for each replicate. The outer nuclear layer (ONL)  
876 was assigned as the distance between the apical side and the outer plexiform layer; the inner  
877 nuclear layer (INL) as the distance between the inner plexiform layer and the outer plexiform

878 layer; the ganglion cell layer (GCL) was assigned as the layer between the inner plexiform  
879 layer and the most basal position of the retina.

880

### 881 **PH3+ cells count**

882 To count the number of PH3+ cells in whole retinas, the Tg(hsp70:H2B-RFP) was used to  
883 identify the boundaries of the tissue. Then, stacks covering the whole tissue were acquired  
884 using the laser-scanning confocal. Images were imported in Imaris and the mask tool was used  
885 to isolate the retinal tissue from the rest of the tissues in the image. The spot detection tool was  
886 used to count the number of PH3+ cells with these parameters: diameter = 8  $\mu\text{m}$  (x-y  
887 dimensions), PSF modelling = 16  $\mu\text{m}$ . Threshold for detection of the PH3+ nuclei was adjusted  
888 manually to ensure that all the PH3+ nuclei were counted but was usually kept around 1800.

889

### 890 **Statistical analysis**

891 All Statistical tests used are indicated in the figure legend, as well as the definitions of error  
892 bars. All test used were two-sided and 95% confidence intervals were considered. P values are  
893 indicated in the figure legends, as well as sample sizes, or in Table 1 for experiments in Figure  
894 3B. Data were analysed using GraphPad Prism 6 or Python 3. Statistical analysis was  
895 performed using GraphPad Prism 6 and Julia 1.7.2. Information about the exact libraries,  
896 together with their versions, used for the *Event plots* and for the *in-silico stochastic model* are  
897 detailed in the *Project.toml* and *Manifest.toml* files in the respective Git repositories, as per  
898 standard dependency handling procedures of the Julia language:

- 899 • <https://git.mpi-cbg.de/nerli/lineage-analysis>
- 900 • <https://git.mpi-cbg.de/bianucci/transcription-factors-interactions>

901

### 902 **Event plots**

903 *Event plots* were produced from the raw experimental data using a custom data analysis and  
904 plotting pipeline developed by the authors, which is available at [https://git.mpi-](https://git.mpi-cbg.de/nerli/lineage-analysis)  
905 [cbg.de/nerli/lineage-analysis](https://git.mpi-cbg.de/nerli/lineage-analysis). The code comes together with the data files, allowing for an easy  
906 and complete replication of the analysis and plots that appear in this work.

907 The data analysis consists of the following steps:

- 908 1. Consider the time at which each division occurs as the time of the fate decision event  
909 and categorize these events by the fate acquired by the sister cell of the PRpr.



- 910 2. Compute the Kernel Density Estimation (KDE) of the distribution of events over time  
911 for each fate type and for the total distribution of divisions.
- 912 3. Rescale the KDE of each fate by the KDE of all divisions to obtain an estimation of the  
913 probability of acquiring the different fates dependent on the time the division occurs.
- 914 4. Use the *bootstrap* resampling method<sup>92</sup> to obtain uncertainties of the KDEs and of the  
915 fate probabilities.

916

### 917 **In-silico stochastic model of cell fate decision**

918 To evaluate the potential of candidate GRNs to reproduce our experimental data of the  
919 probabilistic branch of the lineage, we designed and implemented a simple *in-silico*  
920 phenomenological model of stochastic fate decisions. The code is available  
921 at <https://git.mpi-cbg.de/bianucci/transcription-factors-interactions>.

922 Since we know from the lineage analysis data that each division produces one PRpr and  
923 one sister cell whose fate is stochastically determined, we modelled only one fate decision per  
924 division. Also, as the TFs Atoh7, Ptf1a and Prdm1a are responsible for the specification of the  
925 different neuronal fates, we modelled their expression as random variables, with time-  
926 dependent expected values. Their expression levels were normalized with respect to an *effective*  
927 *threshold*, i.e., a level at which they start to carry out their inhibitory function and produce a  
928 downstream effect.

929 The simulation of this model relies on drawing N=100 fate decisions for each time point  
930 to estimate the shares of different fates, this was then repeated for R=100 times to compute the  
931 mean and confidence interval of these shares. The TF levels were modelled as normally  
932 distributed, with a time-dependent mean value and a constant standard deviation. Being the  
933 threshold set at the arbitrary value of 1.0, in the model we set the mean expression levels of  
934 Atoh7, Prdm1a at the values of 1.1 and 1.05 respectively. The mean levels for these TFs were  
935 kept constant over time. The mean expression level for Ptf1a was instead time-dependent<sup>69</sup> and  
936 increased according to a logistic function with lower and upper asymptotes at 0.9 and 1.1  
937 respectively.

938 The standard deviation was constant over time for all TFs and was computed by multiplying a  
939 fixed coefficient of variation (CV=0.14) by the time-averaged expression level of each TF.

940 Finally, the GRN was modelled as a decision rule occurring at the terminal branching point of  
941 the lineage (Figure 1G), taking the TF levels as input, and producing a fate choice as output.  
942 Any inhibition in the GRN was translated into a *precedence* rule, i.e., a TF that inhibits a second  
943 one is able, if its level is above the threshold, to determine the acquisition of a certain fate,

944 while the inhibited TF is ignored. The precedence rule for Scenario A (Figure 4C,E) is  
945 illustrated by the following diagram:

```
946     if      ptf1a > threshold      →    IN
947     elseif  atoh7 > threshold      →    RGC
948     elseif  prdm1a > threshold     →    PR
949     else                               →    BC
```

950 To achieve inhibition of the target TF in additive inhibitions, it was enough that the sum of the  
951 levels of the inhibitors involved was above the threshold. The precedence rule in the additive  
952 inhibition case (Scenario B, Figure 4D,F) is illustrated by the following diagram:

```
953     if      ptf1a > threshold                →    IN
954     elseif  atoh7+ptf1a > threshold          →    RGC
955     elseif  prdm1a+atoh7+ptf1a > threshold →    PR
956     else                               →    BC
```

957 In summary, the fate decision model consists of (1) drawing independent and normally  
958 distributed stochastic TF expression levels, (2) applying the decision rule and recording the  
959 resulting fate, (3) repeating this stochastic decision for 100 divisions taking place at any given  
960 time point and (4) again repeating the whole process for 100 times, creating a synthetic dataset  
961 that can then be analysed in the same way as the experimental data.

962  
963  
964  
965  
966  
967  
968  
969  
970  
971  
972  
973  
974  
975  
976

## Supplementary Figure 1

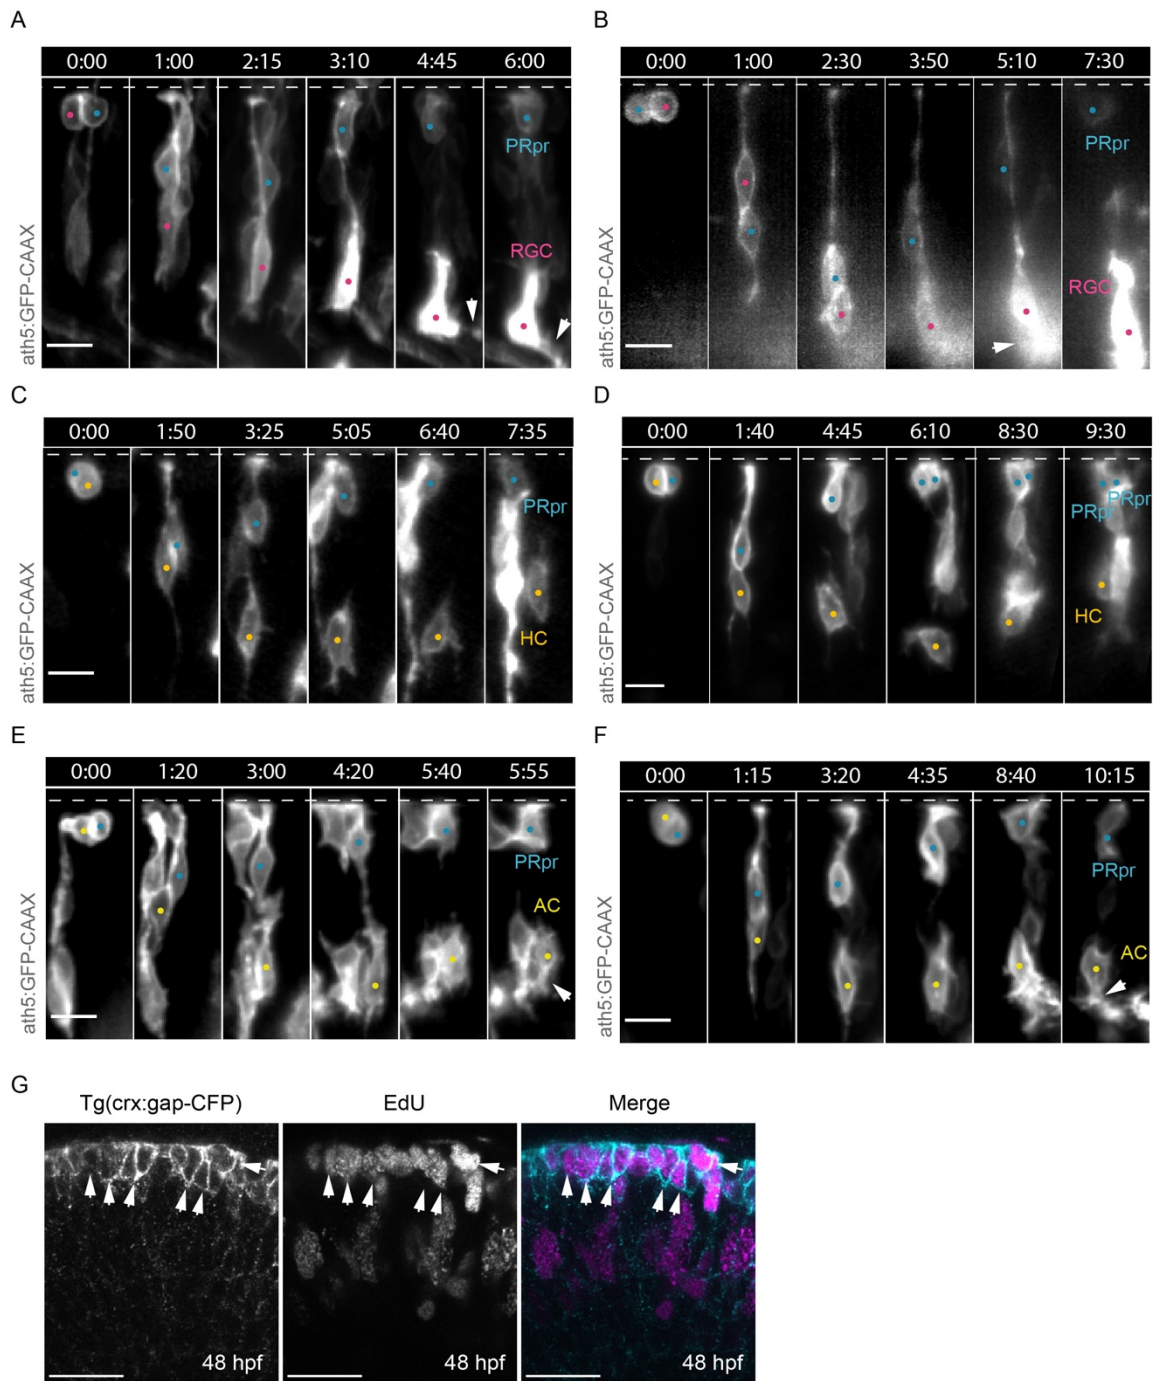

977

978

979

980

981

982

983

984

985 **Supplementary Figure 1. Atoh7+ progenitors divisions producing a PRpr and a sister cell**

986 A) Montage of Atoh7+ progenitor division generating an RGC (magenta dot) and a PRpr  
987 (cyan dot). Dashed line indicates the apical side, arrowhead points to RGC axon.  
988 ath5:GFP-CAAX (Atoh7, grey), scale bar 10  $\mu$ m.

989 B) Montage of Atoh7+ progenitor division generating an RGC (magenta dot) and a PRpr  
990 (cyan dot). Dashed line indicates the apical side, arrowhead points to RGC axon.  
991 ath5:GFP-CAAX (Atoh7, grey), scale bar 10  $\mu$ m.

992 C) Montage of Atoh7+ progenitor division generating an AC (yellow dot) and a PRpr  
993 (cyan dot). Dashed line indicates the apical side, arrowhead points to basal dendrites.  
994 ath5:GFP-CAAX (Atoh7, grey), scale bar 10  $\mu$ m.

995 D) Montage of Atoh7+ progenitor division generating an AC (yellow dot) and a PRpr  
996 (cyan dot). Dashed line indicates the apical side, arrowhead points to basal dendrites.  
997 ath5:GFP-CAAX (Atoh7, grey), scale bar 10  $\mu$ m.

998 E) Montage of Atoh7+ progenitor division generating an HC (orange dot) and a PRpr  
999 (cyan dot). Dashed line indicates the apical side. ath5:GFP-CAAX (Atoh7, grey), scale  
1000 bar 10  $\mu$ m.

1001 F) Montage of Atoh7+ progenitor division generating an HC (orange dot) and a PRpr  
1002 (cyan dot). Dashed line indicates the apical side. ath5:GFP-CAAX (Atoh7, grey), scale  
1003 bar 10  $\mu$ m.

1004 G) Proliferative status of photoreceptor precursors, labelled by Tg(crx:gap-CFP) (right)  
1005 and EdU (centre), at 48 hpf. In merged image, Tg(crx:gap-CFP) (cyan) and EdU  
1006 (magenta). Scale bar, 20  $\mu$ m, arrowheads point to Crx+/EdU+ PRpr.

1007

1008

1009

1010

1011

1012

1013

1014

1015

1016

1017

1018

## Supplementary Figure 2

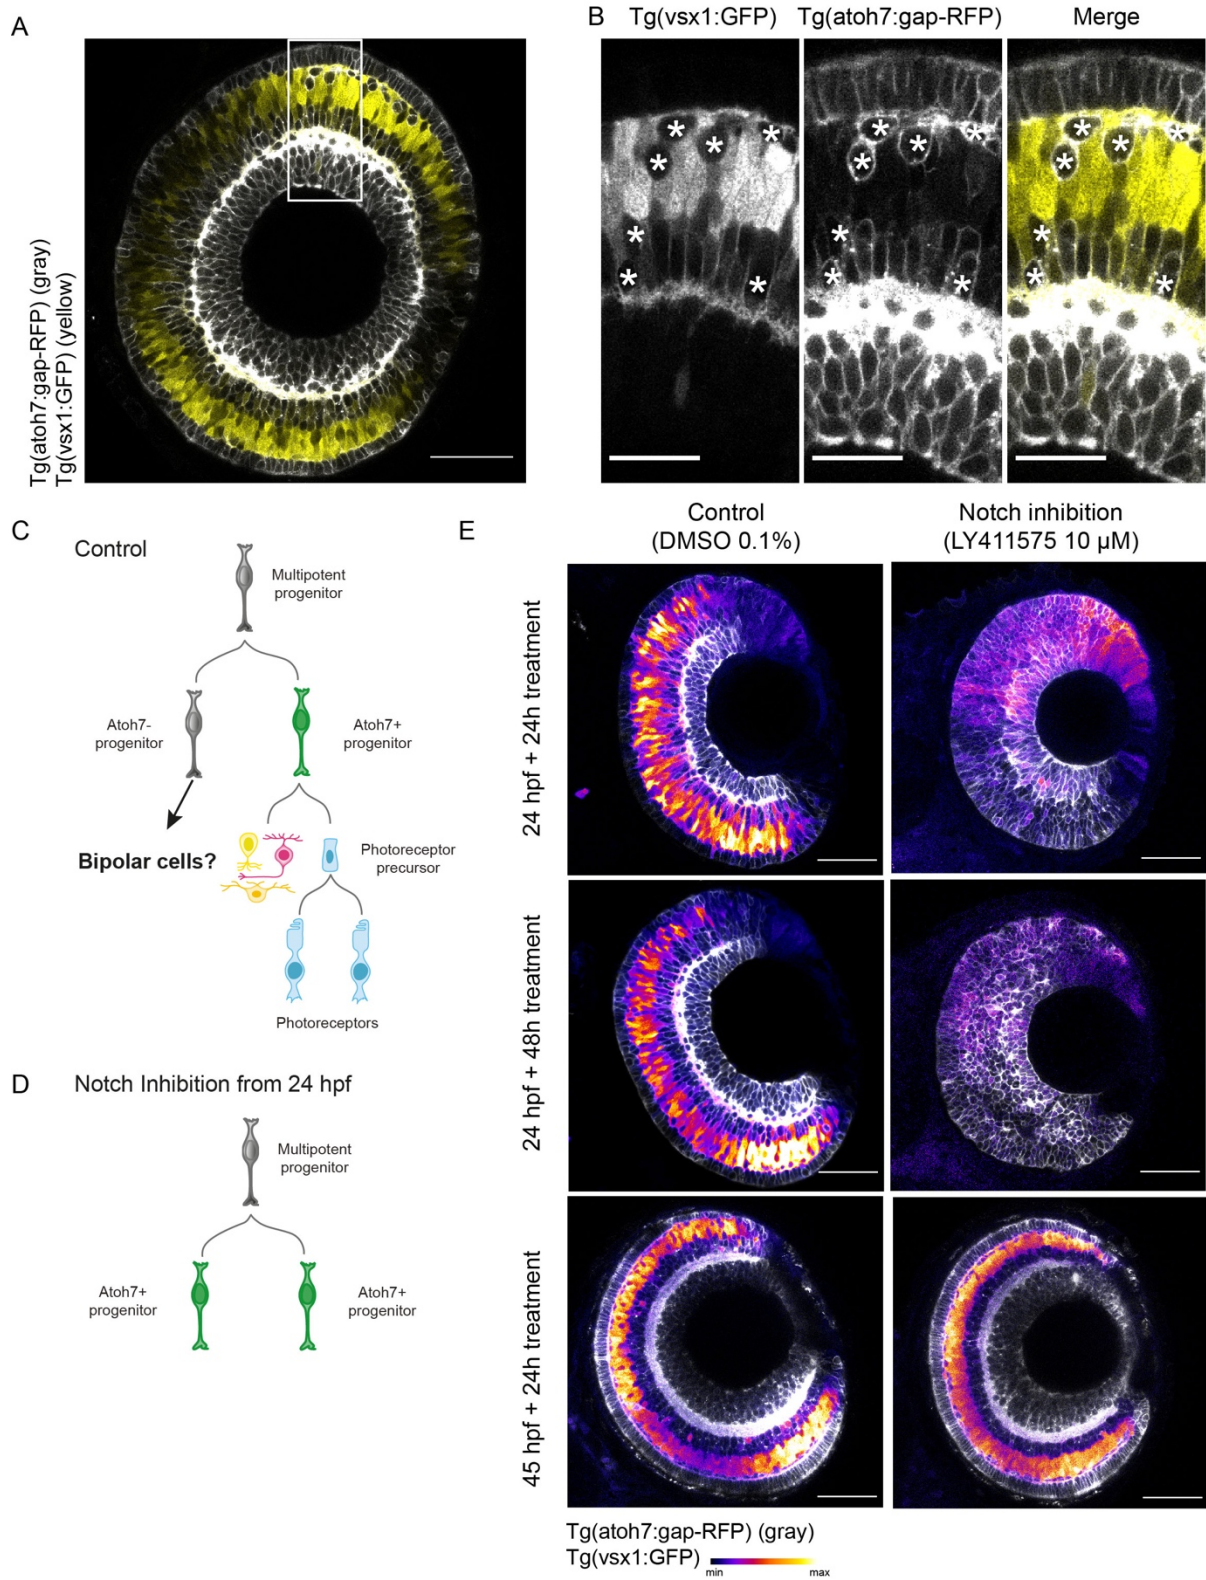

1019

1020

1021

1022

1023 **Supplementary Figure 2. Bipolar cells originate from the Atoh7-negative sister cell of the**  
1024 **Atoh7+ progenitor.**

- 1025 A) Double transgenic line Tg(atoh7:gapRFP),Tg (vsx1:GFP) labelling Atoh7+ neurons  
1026 (grey) and Bipolar cells (Vsx1+, yellow) at 60 hpf. Scale bar 50  $\mu$ m.  
1027 B) Close-up of (A) Tg (vsx1:GFP) ( left), Tg(atoh7:gapRFP) (center) and their overlap  
1028 (right). Stars indicate Atoh7+ Vsx1- cells. Scale bar 20  $\mu$ m.  
1029 C) Schematic of asymmetric division of multipotent progenitors that give rise to an  
1030 Atoh7+ progenitor and an Atoh7- progenitor.  
1031 D) Schematics of symmetric multipotent progenitor divisions that produce two Atoh7+  
1032 progenitors, occurring upon Notch inhibition from 24 hpf.  
1033 E) Notch inhibition experiment. Left images show controls, right images show the Notch  
1034 inhibition conditions with 10  $\mu$ M LY411575 from 24 hpf and from 45 hpf. Treatment  
1035 windows are indicated in the figure. Scale bar 50  $\mu$ m.

1036  
1037  
1038  
1039  
1040  
1041  
1042  
1043  
1044  
1045  
1046  
1047  
1048  
1049  
1050  
1051  
1052  
1053  
1054  
1055  
1056

### Supplementary figure 3

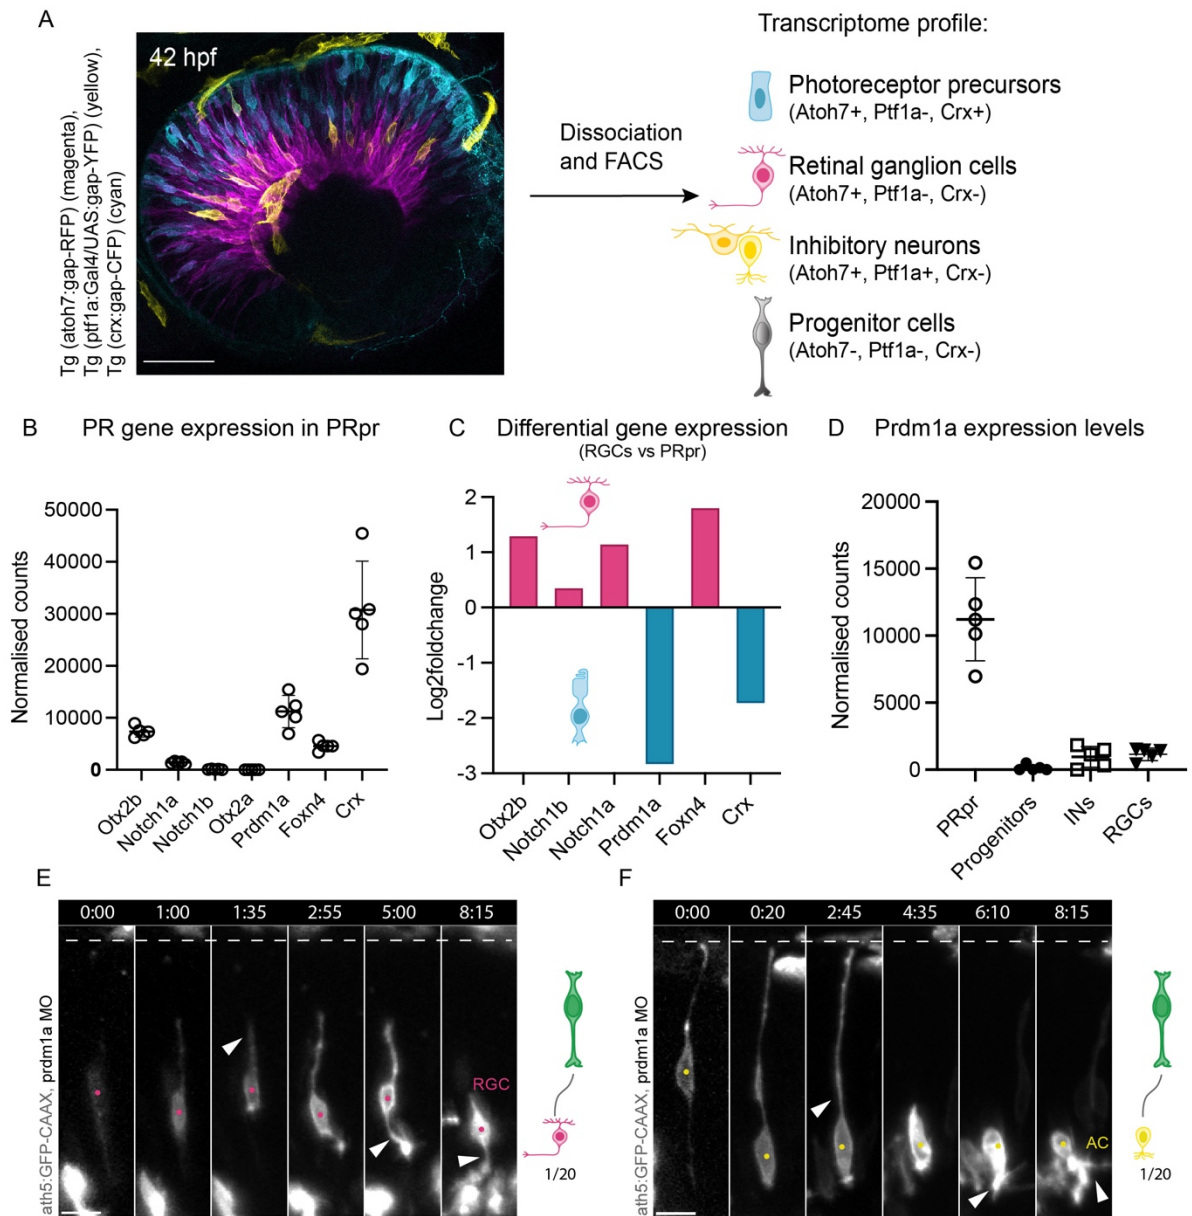

1057

1058

1059

1060

1061

1062

1063

1064

1065

1066

1067

1068 **Supplementary Figure 3. Prdm1a knockdown depletes PRs.**

- 1069 A) Strategy for transcriptomics of PRpr, RGCs, INs as well as progenitor cells at 42 hpf.  
1070 Atoh7<sup>+</sup> cells (magenta), inhibitory neurons (yellow) and photoreceptors (cyan).  
1071 Different cell types were selected based on the expression of different fluorophore  
1072 combinations.
- 1073 B) Normalised counts of PR-related genes in the PRpr population from transcriptomics  
1074 experiment.
- 1075 C) Differential expression of the same PR-related genes in the PR vs RGC comparison at  
1076 42 hpf. Magenta bar plots show genes enriched in the RGC population; cyan bar plots  
1077 show genes enriched in the PR population.
- 1078 D) Normalised counts of Prdm1a expression levels in the PRpr, progenitors, INs and RGCs  
1079 populations.
- 1080 E) Montage of Atoh7<sup>+</sup> progenitor generating an RGC (magenta dot) without dividing.  
1081 Dashed line indicates the apical side, arrowhead points at first retraction of the apical  
1082 process (t = 1:35), then axon. ath5:GFP-CAAX (Atoh7, grey), scale bar 10  $\mu$ m.
- 1083 F) Montage of Atoh7<sup>+</sup> progenitor generating an AC (yellow dot) without dividing. Dashed  
1084 line indicates the apical side, arrowhead points to first retraction of the apical process  
1085 (t = 2:45), then to dendrites (t = 6.10 and t = 8.15). ath5:GFP-CAAX (Atoh7, grey),  
1086 scale bar 10  $\mu$ m.

1087  
1088  
1089  
1090  
1091  
1092  
1093  
1094  
1095  
1096  
1097  
1098  
1099



## Supplementary figure 4

### A Events plots for all neurogenic divisions

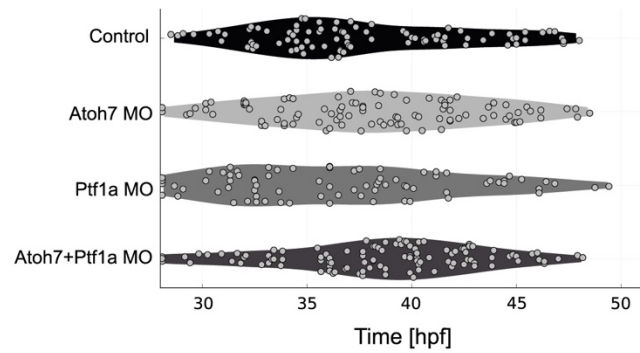

### B Kernel density estimation

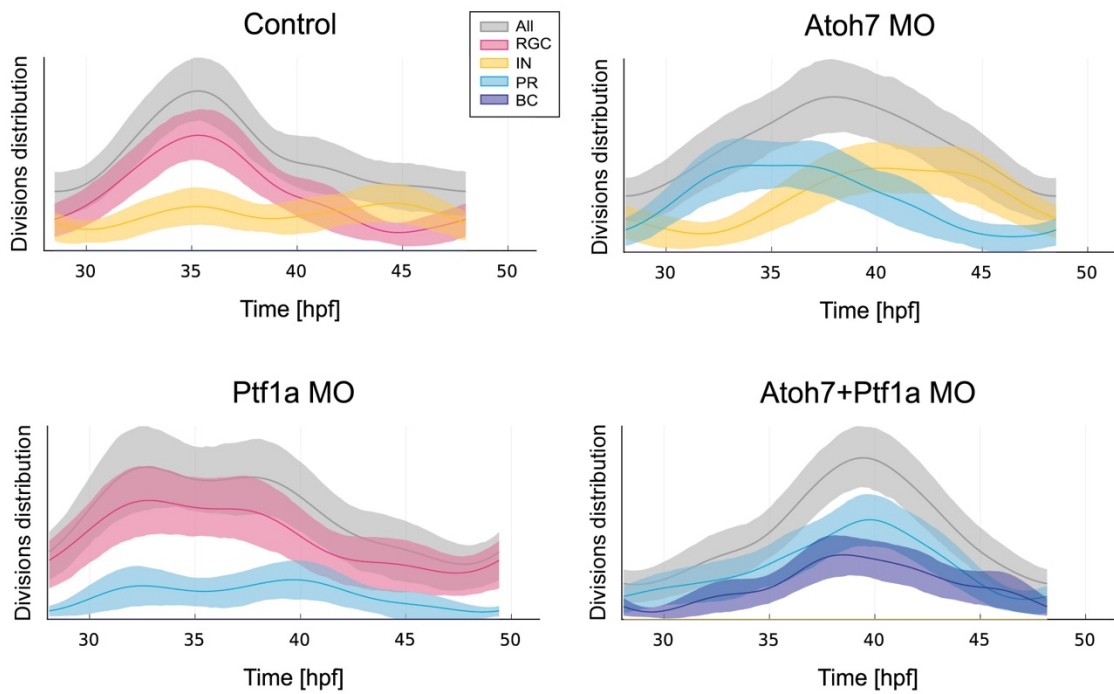

1100

1101

1102

1103

1104

1105

1106

1107

1108

1109

1110

1111 **Supplementary figure 4. Absence of key TFs does not alter overall lineage topology.**

1112 A) Distribution of each neurogenic Atoh7+ division from 28 hpf in control, Atoh7  
1113 morphants, Ptf1a morphants and double Atoh7/Ptf1a morphants. Time in hpf.  
1114 Kolmogorov Smirnov test to compare distributions. Control vs Atoh7 morphant,  $p =$   
1115 0.0836 (ns), Control vs Ptf1a morphant,  $p = 0.1369$  (ns), Control vs Atoh7 + Ptf1a  
1116 morphant,  $p = 0.0023$ .

1117 B) Kernel Density Estimation (KDE) of the distribution of events over time for each fate  
1118 (coloured plots) and for the total distribution of Atoh7+ divisions (grey plots) during  
1119 development in control, Atoh7 morphants, Ptf1a morphants and double Atoh7/Ptf1a  
1120 morphants. Time in hpf. Mean (dark line) and 95% confidence interval (thick  
1121 transparent stripe) are plotted.

1122  
1123  
1124  
1125  
1126  
1127  
1128  
1129  
1130  
1131  
1132  
1133  
1134  
1135  
1136  
1137  
1138  
1139  
1140  
1141  
1142  
1143  
1144  
1145  
1146

## 1147 **Video legends**

### 1148 **Video 1: Division patterns of Atoh7+ retinal progenitors in controls.**

1149 *Part 1:* Asymmetric division of an Atoh7+ progenitor generating one RGC and one PRpr.  
1150 Cells are labelled using ath5:GFP-CAAX (grey). Time is shown in minutes. Magenta and  
1151 cyan dots label RGC and PRpr, respectively. Arrow points to RGC axon.

1152 *Part 2:* Asymmetric division of an Atoh7+ progenitor generating one inhibitory neuron (HC)  
1153 and one PRpr. Cells are labelled using ath5:GFP-CAAX (grey). Time is shown in minutes.  
1154 Orange and cyan dots label HC and PRpr, respectively.

1155 *Part 3:* Asymmetric division of an Atoh7+ progenitor generating one inhibitory neuron (AC)  
1156 and one PRpr. Cells are labelled using ath5:GFP-CAAX (grey). Time is shown in minutes.  
1157 Yellow and cyan dots label AC and PRpr, respectively. Arrow points to AC basal dendrites.

### 1158 **Video 2: Division patterns of Atoh7+ retinal progenitors in Prdm1a morphants.**

1159 Asymmetric division of an Atoh7+ progenitor generating one inhibitory neuron and one cell  
1160 of undefined state. Cells are labelled using ath5:GFP-CAAX (grey). Time is shown in  
1161 minutes. Orange and purple dots label Inhibitory neuron and cell of unknown state,  
1162 respectively. Arrow points towards dynamic basal process of the cell of unknown state.

### 1163 **Video 3: Division patterns of Atoh7+ retinal progenitors in Atoh7/Ptfla double** 1164 **morphants.**

1165 *Part 1:* Symmetric division of an Atoh7+ progenitor generating two PRpr. Cells are labelled  
1166 using ath5:GFP-CAAX (grey). Time is shown in minutes. Cyan dots label the two PRprs.

1167 *Part 2:* Asymmetric division of an Atoh7+ progenitor generating one bipolar cell (BC) and  
1168 one PRpr. Cells are labelled using ath5:GFP-CAAX (grey). Time is shown in minutes. Blue  
1169 and cyan dots label BC and PRpr, respectively.

1170

1171

1172

1173 **Author contributions:**

1174 Conceptualization, E.N., T.B. and C.N.; Methodology, E.N., J.K., T.B., M.R.M., C.Z., and  
1175 C.N.; Software, E.N and T.B.; Investigation, E.N., J.K., T.B., M.R.M.; Writing – Original  
1176 Draft, E.N., T.B. and C.N.; Writing – Review & Editing, E.N., J.K., T.B., M.R.M., C.Z., and  
1177 C.N.; Visualisation: E.N., T.B. and C.N.; Supervision, E.N., C.Z., and C.N; Funding  
1178 Acquisition, C.Z., and C.N..

1179

1180 **Funding:**

1181 EN was supported by the MPI CBG and EN and TB are members of the IMPRS-CellDevoSys  
1182 PhD program. EN is also associated with the IBB-Integrative Biology and Biomedicine PhD  
1183 program.

1184 C.N was supported by MPI-CBG, the FCG-IGC, Fundação para a Ciência e a Tecnologia  
1185 Investigator grant (CEECIND/03268/2018), the German Research Foundation (NO 1069/5-1)  
1186 and an ERC consolidator grant (H2020 ERC-2018-CoG-81904). C.Z. and T.B were supported  
1187 by MPI-CBG and the DFG under Germany’s Excellence Strategy (EXC-2068–390729961)  
1188 Cluster of Excellence Physics of Life of TU Dresden.

1189

1190 **Acknowledgements**

1191 We thank the Norden lab, the Zechner lab, the Modes lab and Pablo Sartori for fruitful  
1192 discussions on the project.

1193 We are grateful to Anne Grapin-Botton and William A. Harris for helpful comments on the  
1194 manuscript.

1195 Sylvia Kaufmann, Heike Hollak, Tânia Ferreira and João Coelho are thanked for technical help.

1196 We further thank the Computer Department, the Light Microscopy, Scientific Computing and  
1197 Fish facilities of the Max Planck Institute of Molecular Cell Biology and Genetics as well as  
1198 Advanced Imaging Unit and the Aquatic Facility at the Instituto Gulbenkian de Ciência for  
1199 experimental support. We thank the Deep Sequencing Facility at the Genome Centre of the  
1200 TUD for RNA-Seq and transcriptomic analysis.

## 1201 **References**

- 1202 1. Manto, M., and Jissendi, P. (2012). Cerebellum: links between development,  
1203 developmental disorders and motor learning. *Frontiers in Neuroanatomy* 6.
- 1204 2. Tonchev, A.B., Tuoc, T.C., Rosenthal, E.H., Studer, M., and Stoykova, A. (2016). Zbtb20  
1205 modulates the sequential generation of neuronal layers in developing cortex. *Mol Brain* 9,  
1206 65.
- 1207 3. Macagno, E.R. (1978). Mechanism for the formation of synaptic projections in the  
1208 arthropod visual system. *Nature* 275, 318–320.
- 1209 4. Tomassy, G.S., De Leonibus, E., Jabaudon, D., Lodato, S., Alfano, C., Mele, A., Macklis,  
1210 J.D., and Studer, M. (2010). Area-specific temporal control of corticospinal motor neuron  
1211 differentiation by COUP-TFI. *Proc Natl Acad Sci U S A* 107, 3576–3581.
- 1212 5. Guarnieri, F.C., de Chevigny, A., Falace, A., and Cardoso, C. (2018). Disorders of  
1213 neurogenesis and cortical development. *Dialogues Clin Neurosci* 20, 255–266.
- 1214 6. Brody, T., and Odenwald, W.F. (2000). Programmed transformations in neuroblast gene  
1215 expression during *Drosophila* CNS lineage development. *Dev. Biol.* 226, 34–44.
- 1216 7. Isshiki, T., Pearson, B., Holbrook, S., and Doe, C.Q. (2001). *Drosophila* neuroblasts  
1217 sequentially express transcription factors which specify the temporal identity of their  
1218 neuronal progeny. *Cell* 106, 511–521.
- 1219 8. Grosskortenhaus, R., Robinson, K.J., and Doe, C.Q. (2006). Pdm and Castor specify late-  
1220 born motor neuron identity in the NB7-1 lineage. *Genes Dev* 20, 2618–2627.
- 1221 9. Chia, W., Somers, W.G., and Wang, H. (2008). *Drosophila* neuroblast asymmetric  
1222 divisions: cell cycle regulators, asymmetric protein localization, and tumorigenesis. *J Cell*  
1223 *Biol* 180, 267–272.
- 1224 10. Doe, C.Q., and Technau, G.M. (1993). Identification and cell lineage of individual neural  
1225 precursors in the *Drosophila* CNS. *Trends Neurosci.* 16, 510–514.
- 1226 11. Campos-Ortega, J.A. (1995). Genetic mechanisms of early neurogenesis in *Drosophila*  
1227 *melanogaster*. *Mol Neurobiol* 10, 75–89.
- 1228 12. Cleary, M.D., and Doe, C.Q. (2006). Regulation of neuroblast competence: multiple  
1229 temporal identity factors specify distinct neuronal fates within a single early competence  
1230 window. *Genes Dev.* 20, 429–434.
- 1231 13. Homem, C.C.F., and Knoblich, J.A. (2012). *Drosophila* neuroblasts: a model for stem cell  
1232 biology. *Development* 139, 4297–4310.
- 1233 14. Li, X., Erlik, T., Bertet, C., Chen, Z., Voutev, R., Venkatesh, S., Morante, J., Celik, A.,  
1234 and Desplan, C. (2013). Temporal patterning of *Drosophila* medulla neuroblasts controls  
1235 neural fates. *Nature* 498, 456–462.
- 1236 15. Kohwi, M., and Doe, C.Q. (2013). Temporal fate specification and neural progenitor  
1237 competence during development. *Nat. Rev. Neurosci.* 14, 823–838.

- 1238 16. Kao, C.-F., and Lee, T. (2010). Birth time/order-dependent neuron type specification.  
1239 *Curr Opin Neurobiol* 20, 14–21.
- 1240 17. Butt, S.J.B., Fuccillo, M., Nery, S., Noctor, S., Kriegstein, A., Corbin, J.G., and Fishell,  
1241 G. (2005). The temporal and spatial origins of cortical interneurons predict their  
1242 physiological subtype. *Neuron* 48, 591–604.
- 1243 18. Batista-Brito, R., Close, J., Machold, R., and Fishell, G. (2008). The distinct temporal  
1244 origins of olfactory bulb interneuron subtypes. *J Neurosci* 28, 3966–3975.
- 1245 19. Livesey, F.J., and Cepko, C.L. (2001). Vertebrate neural cell-fate determination: Lessons  
1246 from the retina. *Nat Rev Neurosci* 2, 109–118.
- 1247 20. Holt, C.E., Bertsch, T.W., Ellis, H.M., and Harris, W.A. (1988). Cellular determination in  
1248 the *Xenopus* retina is independent of lineage and birth date. *Neuron* 1, 15–26.
- 1249 21. Wong, L.L., and Rapaport, D.H. (2009). Defining retinal progenitor cell competence in  
1250 *Xenopus laevis* by clonal analysis. *Development* 136, 1707–1715.
- 1251 22. Cepko, C. (2014). Intrinsically different retinal progenitor cells produce specific types of  
1252 progeny. *Nat. Rev. Neurosci.* 15, 615–627.
- 1253 23. He, J., Zhang, G., Almeida, A.D., Cayouette, M., Simons, B.D., and Harris, W.A. (2012).  
1254 How variable clones build an invariant retina. *Neuron* 75, 786–798.
- 1255 24. Boije, H., Rulands, S., Dudczig, S., Simons, B.D., and Harris, W.A. (2015). The  
1256 Independent Probabilistic Firing of Transcription Factors: A Paradigm for Clonal  
1257 Variability in the Zebrafish Retina. *Dev. Cell* 34, 532–543.
- 1258 25. Gomes, F.L.A.F., Zhang, G., Carbonell, F., Correa, J.A., Harris, W.A., Simons, B.D., and  
1259 Cayouette, M. (2011). Reconstruction of rat retinal progenitor cell lineages in vitro  
1260 reveals a surprising degree of stochasticity in cell fate decisions. *Development* 138, 227–  
1261 235.
- 1262 26. Llorca, A., Ciceri, G., Beattie, R., Wong, F.K., Diana, G., Serafeimidou-Pouliou, E.,  
1263 Fernández-Otero, M., Streicher, C., Arnold, S.J., Meyer, M., et al. (2019). A stochastic  
1264 framework of neurogenesis underlies the assembly of neocortical cytoarchitecture. *eLife*  
1265 8.
- 1266 27. Amini, R., Rocha-Martins, M., and Norden, C. (2018). Neuronal Migration and  
1267 Lamination in the Vertebrate Retina. *Front Neurosci* 11.
- 1268 28. Hoon, M., Okawa, H., Della Santina, L., and Wong, R.O.L. (2014). Functional  
1269 architecture of the retina: development and disease. *Prog Retin Eye Res* 42, 44–84.
- 1270 29. Engerer, P., Petridou, E., Williams, P.R., Suzuki, S.C., Yoshimatsu, T., Portugues, R.,  
1271 Misgeld, T., and Godinho, L. (2021). Notch-mediated re-specification of neuronal  
1272 identity during central nervous system development. *Current Biology*.
- 1273 30. Poggi, L., Vitorino, M., Masai, I., and Harris, W.A. (2005). Influences on neural lineage  
1274 and mode of division in the zebrafish retina in vivo. *J. Cell Biol.* 171, 991–999.

- 1275 31. Nerli, E., Rocha-Martins, M., and Norden, C. (2020). Asymmetric neurogenic  
1276 commitment of retinal progenitors involves Notch through the endocytic pathway. *eLife*  
1277 *9*, e60462.
- 1278 32. Vitorino, M., Jusuf, P.R., Maurus, D., Kimura, Y., Higashijima, S.-I., and Harris, W.A.  
1279 (2009). *Vsx2* in the zebrafish retina: restricted lineages through derepression. *Neural Dev*  
1280 *4*, 14.
- 1281 33. Jusuf, P.R., Almeida, A.D., Randlett, O., Joubin, K., Poggi, L., and Harris, W.A. (2011).  
1282 Origin and Determination of Inhibitory Cell Lineages in the Vertebrate Retina. *J*  
1283 *Neurosci* *31*, 2549–2562.
- 1284 34. Rocha-Martins, M., Kretzschmar, J., Nerli, E., Weigert, M., Icha, J., Myers, E.W., and  
1285 Norden, C. (2021). Bidirectional neuronal migration coordinates retinal morphogenesis  
1286 by preventing spatial competition. 2021.02.08.430189.
- 1287 35. Paolini, A., Duchemin, A.-L., Albadri, S., Patzel, E., Bornhorst, D., González Avalos, P.,  
1288 Lemke, S., Machate, A., Brand, M., Sel, S., et al. (2015). Asymmetric inheritance of the  
1289 apical domain and self-renewal of retinal ganglion cell progenitors depend on Anillin  
1290 function. *Development* *142*, 832–839.
- 1291 36. Icha, J., Kunath, C., Rocha-Martins, M., and Norden, C. (2016). Independent modes of  
1292 ganglion cell translocation ensure correct lamination of the zebrafish retina Kinetics and  
1293 modes of RGC translocation. *J Cell Biol* *215*, 259–275.
- 1294 37. Zolessi, F.R., Poggi, L., Wilkinson, C.J., Chien, C.-B., and Harris, W.A. (2006).  
1295 Polarization and orientation of retinal ganglion cells in vivo. *Neural Development* *1*, 2.
- 1296 38. Icha, J., Schmied, C., Sidhaye, J., Tomancak, P., Preibisch, S., and Norden, C. (2016).  
1297 Using Light Sheet Fluorescence Microscopy to Image Zebrafish Eye Development. *J Vis*  
1298 *Exp*, e53966.
- 1299 39. Hu, M., and Easter, S.S. (1999). Retinal neurogenesis: the formation of the initial central  
1300 patch of postmitotic cells. *Dev. Biol.* *207*, 309–321.
- 1301 40. Schmitt, E.A., and Dowling, J.E. (1999). Early retinal development in the zebrafish,  
1302 *Danio rerio*: light and electron microscopic analyses. *J. Comp. Neurol.* *404*, 515–536.
- 1303 41. Martinez-Morales, J.-R., Del Bene, F., Nica, G., Hammerschmidt, M., Bovolenta, P., and  
1304 Wittbrodt, J. (2005). Differentiation of the vertebrate retina is coordinated by an FGF  
1305 signaling center. *Dev. Cell* *8*, 565–574.
- 1306 42. Suzuki, S.C., Bleckert, A., Williams, P.R., Takechi, M., Kawamura, S., and Wong,  
1307 R.O.L. (2013). Cone photoreceptor types in zebrafish are generated by symmetric  
1308 terminal divisions of dedicated precursors. *Proc Natl Acad Sci U S A* *110*, 15109–15114.
- 1309 43. Weber, I.P., Ramos, A.P., Strzyz, P.J., Leung, L.C., Young, S., and Norden, C. (2014).  
1310 Mitotic position and morphology of committed precursor cells in the zebrafish retina  
1311 adapt to architectural changes upon tissue maturation. *Cell Rep* *7*, 386–397.

- 1312 44. Godinho, L., Williams, P.R., Claassen, Y., Provost, E., Leach, S.D., Kamermans, M., and  
1313 Wong, R.O.L. (2007). Nonapical symmetric divisions underlie horizontal cell layer  
1314 formation in the developing retina in vivo. *Neuron* 56, 597–603.
- 1315 45. Amini, R., Labudina, A.A., and Norden, C. (2019). Stochastic single cell migration leads  
1316 to robust horizontal cell layer formation in the vertebrate retina. *Development* 146.
- 1317 46. Zechner, C., Nerli, E., and Norden, C. (2020). Stochasticity and determinism in cell fate  
1318 decisions. *Development (Cambridge, England)* 147.
- 1319 47. Cepko, C.L., Austin, C.P., Yang, X., Alexiades, M., and Ezzeddine, D. (1996). Cell fate  
1320 determination in the vertebrate retina. *Proc Natl Acad Sci U S A* 93, 589–595.
- 1321 48. Turner, D.L., and Cepko, C.L. (1987). A common progenitor for neurons and glia persists  
1322 in rat retina late in development. *Nature* 328, 131–136.
- 1323 49. Engerer, P., Suzuki, S.C., Yoshimatsu, T., Chapouton, P., Obeng, N., Odermatt, B.,  
1324 Williams, P.R., Misgeld, T., and Godinho, L. (2017). Uncoupling of neurogenesis and  
1325 differentiation during retinal development. *EMBO J.* 36, 1134–1146.
- 1326 50. Brzezinski, J.A., Lamba, D.A., and Reh, T.A. (2010). Blimp1 controls photoreceptor  
1327 versus bipolar cell fate choice during retinal development. *Development* 137, 619–629.
- 1328 51. Emerson, M.M., Surzenko, N., Goetz, J.J., Trimarchi, J., and Cepko, C.L. (2013). Otx2  
1329 and Onecut1 Promote the Fates of Cone Photoreceptors and Horizontal Cells and Repress  
1330 Rod Photoreceptors. *Dev Cell* 26.
- 1331 52. Ghinia Tegla, M.G., Buenaventura, D.F., Kim, D.Y., Thakurdin, C., Gonzalez, K.C., and  
1332 Emerson, M.M. (2020). OTX2 represses sister cell fate choices in the developing retina  
1333 to promote photoreceptor specification. *eLife* 9, e54279.
- 1334 53. Nishida, A., Furukawa, A., Koike, C., Tano, Y., Aizawa, S., Matsuo, I., and Furukawa, T.  
1335 (2003). Otx2 homeobox gene controls retinal photoreceptor cell fate and pineal gland  
1336 development. *Nat Neurosci* 6, 1255–1263.
- 1337 54. Wang, J.C.-C., and Harris, W.A. (2005). The role of combinational coding by  
1338 homeodomain and bHLH transcription factors in retinal cell fate specification.  
1339 *Developmental Biology* 285, 101–115.
- 1340 55. Shen, Y., and Raymond, P.A. (2004). Zebrafish cone-rod (crx) homeobox gene promotes  
1341 retinogenesis. *Developmental Biology* 269, 237–251.
- 1342 56. Furukawa, T., Morrow, E.M., Li, T., Davis, F.C., and Cepko, C.L. (1999). Retinopathy  
1343 and attenuated circadian entrainment in Crx-deficient mice. *Nat Genet* 23, 466–470.
- 1344 57. Goodson, N.B., Park, K.U., Silver, J.S., Chiodo, V.A., Hauswirth, W.W., and Brzezinski,  
1345 J.A. (2020). Prdm1 overexpression causes a photoreceptor fate-shift in nascent, but not  
1346 mature, bipolar cells. *Developmental Biology* 464, 111–123.
- 1347 58. Brzezinski, J.A., Uoon Park, K., and Reh, T.A. (2013). Blimp1 (Prdm1) prevents re-  
1348 specification of photoreceptors into retinal bipolar cells by restricting competence.  
1349 *Developmental Biology* 384, 194–204.



- 1350 59. Liu, C., Ma, W., Su, W., and Zhang, J. (2012). Prdm14 acts upstream of islet2  
1351 transcription to regulate axon growth of primary motoneurons in zebrafish. *Development*  
1352 *139*, 4591–4600.
- 1353 60. Lee, B.C., and Roy, S. (2006). Blimp-1 is an essential component of the genetic program  
1354 controlling development of the pectoral limb bud. *Developmental Biology* *300*, 623–634.
- 1355 61. Pittman, A.J., Law, M.-Y., and Chien, C.-B. (2008). Pathfinding in a large vertebrate  
1356 axon tract: isotypic interactions guide retinotectal axons at multiple choice points.  
1357 *Development* *135*, 2865–2871.
- 1358 62. Randlett, O., MacDonald, R.B., Yoshimatsu, T., Almeida, A.D., Suzuki, S.C., Wong,  
1359 R.O., and Harris, W.A. (2013). Cellular requirements for building a retinal neuropil. *Cell*  
1360 *Rep* *3*, 282–290.
- 1361 63. Almeida, A.D., Boije, H., Chow, R.W., He, J., Tham, J., Suzuki, S.C., and Harris, W.A.  
1362 (2014). Spectrum of Fates: a new approach to the study of the developing zebrafish  
1363 retina. *Development* *141*, 1971–1980.
- 1364 64. Kay, J.N., Finger-Baier, K.C., Roeser, T., Staub, W., and Baier, H. (2001). Retinal  
1365 ganglion cell genesis requires lakritz, a Zebrafish atonal Homolog. *Neuron* *30*, 725–736.
- 1366 65. Johnston, R.J., and Desplan, C. (2008). Stochastic neuronal cell fate choices. *Curr. Opin.*  
1367 *Neurobiol.* *18*, 20–27.
- 1368 66. Raj, A., and van Oudenaarden, A. (2008). Nature, nurture, or chance: stochastic gene  
1369 expression and its consequences. *Cell* *135*, 216–226.
- 1370 67. Raj, A., Rifkin, S.A., Andersen, E., and van Oudenaarden, A. (2010). Variability in gene  
1371 expression underlies incomplete penetrance. *Nature* *463*, 913–918.
- 1372 68. Elowitz, M.B., Levine, A.J., Siggia, E.D., and Swain, P.S. (2002). Stochastic gene  
1373 expression in a single cell. *Science* *297*, 1183–1186.
- 1374 69. Jusuf, P.R., and Harris, W.A. (2009). Ptf1a is expressed transiently in all types of  
1375 amacrine cells in the embryonic zebrafish retina. *Neural Development* *4*, 34.
- 1376 70. Rapaport, D.H., Patheal, S.L., and Harris, W.A. (2001). Cellular competence plays a role  
1377 in photoreceptor differentiation in the developing *Xenopus* retina. *J. Neurobiol.* *49*, 129–  
1378 141.
- 1379 71. Gao, P., Postiglione, M.P., Krieger, T.G., Hernandez, L., Wang, C., Han, Z., Streicher,  
1380 C., Pampusheva, E., Insolera, R., Chugh, K., et al. (2014). Deterministic progenitor  
1381 behavior and unitary production of neurons in the neocortex. *Cell* *159*, 775–788.
- 1382 72. Hippenmeyer, S., Youn, Y.H., Moon, H.M., Miyamichi, K., Zong, H., Wynshaw-Boris,  
1383 A., and Luo, L. (2010). Genetic mosaic dissection of *Lis1* and *Ndel1* in neuronal  
1384 migration. *Neuron* *68*, 695–709.
- 1385 73. Brand, A.H., and Livesey, F.J. (2011). Neural Stem Cell Biology in Vertebrates and  
1386 Invertebrates: More Alike than Different? *Neuron* *70*, 719–729.

- 1387 74. Yu, F., Kuo, C.T., and Jan, Y.N. (2006). *Drosophila* neuroblast asymmetric cell division:  
1388 recent advances and implications for stem cell biology. *Neuron* *51*, 13–20.
- 1389 75. Hafler, B.P., Surzenko, N., Beier, K.T., Punzo, C., Trimarchi, J.M., Kong, J.H., and  
1390 Cepko, C.L. (2012). Transcription factor *Olig2* defines subpopulations of retinal  
1391 progenitor cells biased toward specific cell fates. *Proc. Natl. Acad. Sci. U.S.A.* *109*,  
1392 7882–7887.
- 1393 76. Hevner, R.F. (2019). Intermediate progenitors and *Tbr2* in cortical development. *J Anat*  
1394 *235*, 616–625.
- 1395 77. Noctor, S.C., Martínez-Cerdeño, V., Ivic, L., and Kriegstein, A.R. (2004). Cortical  
1396 neurons arise in symmetric and asymmetric division zones and migrate through specific  
1397 phases. *Nat. Neurosci.* *7*, 136–144.
- 1398 78. Arendt, D. (2003). Evolution of eyes and photoreceptor cell types. *Int J Dev Biol* *47*,  
1399 563–571.
- 1400 79. Lamb, T.D., Collin, S.P., and Pugh, E.N. (2007). Evolution of the vertebrate eye: opsins,  
1401 photoreceptors, retina and eye cup. *Nat Rev Neurosci* *8*, 960–976.
- 1402 80. Gaziova, I., and Bhat, K.M. (2009). Ancestry-independent fate specification and  
1403 plasticity in the developmental timing of a typical *Drosophila* neuronal lineage.  
1404 *Development* *136*, 263–274.
- 1405 81. Cayouette, M., Whitmore, A.V., Jeffery, G., and Raff, M. (2001). Asymmetric  
1406 segregation of *Numb* in retinal development and the influence of the pigmented  
1407 epithelium. *J. Neurosci.* *21*, 5643–5651.
- 1408 82. Cayouette, M., and Raff, M. (2003). The orientation of cell division influences cell-fate  
1409 choice in the developing mammalian retina. *Development* *130*, 2329–2339.
- 1410 83. Kechad, A., Jolicoeur, C., Tufford, A., Mattar, P., Chow, R.W.Y., Harris, W.A., and  
1411 Cayouette, M. (2012). *Numb* is Required for the Production of Terminal Asymmetric  
1412 Cell Divisions in the Developing Mouse Retina. *J Neurosci* *32*, 17197–17210.
- 1413 84. Kimmel, C.B., Ballard, W.W., Kimmel, S.R., Ullmann, B., and Schilling, T.F. (1995).  
1414 Stages of embryonic development of the zebrafish. *Dev. Dyn.* *203*, 253–310.
- 1415 85. Kwan, K.M., Fujimoto, E., Grabher, C., Mangum, B.D., Hardy, M.E., Campbell, D.S.,  
1416 Parant, J.M., Yost, H.J., Kanki, J.P., and Chien, C.-B. (2007). The Tol2kit: A multisite  
1417 gateway-based construction kit for Tol2 transposon transgenesis constructs. *Dev. Dyn.*  
1418 *236*, 3088–3099.
- 1419 86. Picelli, S., Björklund, Å.K., Faridani, O.R., Sagasser, S., Winberg, G., and Sandberg, R.  
1420 (2013). Smart-seq2 for sensitive full-length transcriptome profiling in single cells. *Nat*  
1421 *Methods* *10*, 1096–1098.
- 1422 87. Robu, M.E., Larson, J.D., Nasevicius, A., Beiraghi, S., Brenner, C., Farber, S.A., and  
1423 Ekker, S.C. (2007). p53 Activation by Knockdown Technologies. *PLOS Genetics* *3*, e78.

- 1424 88. Icha, J., Kunath, C., Rocha-Martins, M., and Norden, C. (2016). Independent modes of  
1425 ganglion cell translocation ensure correct lamination of the zebrafish retina Kinetics and  
1426 modes of RGC translocation. *J Cell Biol* *215*, 259–275.
- 1427 89. Schindelin, J., Arganda-Carreras, I., Frise, E., Kaynig, V., Longair, M., Pietzsch, T.,  
1428 Preibisch, S., Rueden, C., Saalfeld, S., Schmid, B., et al. (2012). Fiji: an open-source  
1429 platform for biological-image analysis. *Nat Methods* *9*, 676–682.
- 1430 90. Amini, R., Bhatnagar, A., Schlüßler, R., Möllmert, S., Guck, J., and Norden, C. (2022).  
1431 Amoeboid-like migration ensures correct horizontal cell layer formation in the  
1432 developing vertebrate retina. *eLife* *11*, e76408.
- 1433 91. Meijering, E., Dzyubachyk, O., and Smal, I. (2012). Methods for cell and particle  
1434 tracking. *Meth. Enzymol.* *504*, 183–200.
- 1435 92. Efron, B. (1979). Bootstrap Methods: Another Look at the Jackknife. *The Annals of*  
1436 *Statistics* *7*, 1–26.
- 1437
- 1438
